# Supplementary material
Source: PubMed Central journal article supplement (PMC7609459)
Supplement: NIHMS1591528-supplement-Supplementary_material.pdf [file NIHMS1591528-supplement-Supplementary_material.pdf]

**STable 1. Number of injury and control enrollees and estimated average per-person one-year number and associated value of lost work days due to non-fatal injuries (by mechanism) initially treated in an emergency department during October 1, 2014 through September 30, 2015, Marketscan – Employer health insurance enrollees age 18-64 years, ED disposition: All (2015 USD)**

| Mechanism                                      | Measure                                       | Work absence          | Short-term disability | Workers' compensation | Total days and cost |
|------------------------------------------------|-----------------------------------------------|-----------------------|-----------------------|-----------------------|---------------------|
| Cut/pierce                                     | Injury patients, n                            | 700                   | 3,364                 | 2,245                 |                     |
|                                                | With >0 absences, n patients                  | 551                   | 322                   | 54                    |                     |
|                                                | No. absences (patients with >0), mean n days  | 36.22                 | 40.39                 | 42.46                 |                     |
|                                                | No. absences (all patients), mean n days      | 28.51                 | 3.87                  | 1.02                  |                     |
|                                                | Control enrollees, n                          | 3,153                 | 16,430                | 10,807                |                     |
|                                                | With >0 absences, n enrollees                 | 2,399                 | 897                   | 229                   |                     |
|                                                | No. absences (enrollees with >0), mean n days | 34.10                 | 41.26                 | 46.67                 |                     |
|                                                | No. absences (all enrollees), mean n days     | 25.94                 | 2.25                  | 0.99                  |                     |
|                                                | Estimated attributable absences and cost      |                       |                       |                       |                     |
|                                                | Absent days, simple mean                      | 2.57                  | 1.62                  | 0.03                  | 4.2                 |
| Absent days, regression-adjusted mean (95% CI) | 2.1 (0.1-4.0)                                 | 1.9 (1.2-2.7)         | NS                    | 3.9 (2.4-5.4)         |                     |
| Estimated cost, mean (95% CI)                  | \$288 (13-564)                                | \$267 (162-373)       | NS                    | \$555 (344-754)       |                     |
| Drowning/submersion                            | Injury patients, n                            | 1                     | 12                    | 9                     |                     |
|                                                | With >0 absences, n patients                  | 0                     | 3                     | 0                     |                     |
|                                                | No. absences (patients with >0), mean n days  | 0.00                  | 24.05                 | 0.00                  |                     |
|                                                | No. absences (all patients), mean n days      | 0.00                  | 6.01                  | 0.00                  |                     |
|                                                | Control enrollees, n                          | 5                     | 57                    | 41                    |                     |
|                                                | With >0 absences, n enrollees                 | 4                     | 3                     | 1                     |                     |
|                                                | No. absences (enrollees with >0), mean n days | 28.63                 | 11.67                 | 2.14                  |                     |
|                                                | No. absences (all enrollees), mean n days     | 22.90                 | 0.61                  | 0.05                  |                     |
|                                                | Estimated attributable absences and cost      |                       |                       |                       |                     |
|                                                | Absent days, simple mean                      | NC                    | NC                    | NC                    | NC                  |
| Absent days, regression-adjusted mean (95% CI) | NC                                            | NC                    | NC                    | NC                    |                     |
| Estimated cost, mean (95% CI)                  | NC                                            | NC                    | NC                    | NC                    |                     |
| Fall                                           | Injury patients, n                            | 1,167                 | 6,654                 | 4,142                 |                     |
|                                                | With >0 absences, n patients                  | 903                   | 1,372                 | 162                   |                     |
|                                                | No. absences (patients with >0), mean n days  | 41.54                 | 55.09                 | 53.46                 |                     |
|                                                | No. absences (all patients), mean n days      | 32.14                 | 11.36                 | 2.09                  |                     |
|                                                | Control enrollees, n                          | 5,159                 | 32,284                | 19,765                |                     |
|                                                | With >0 absences, n enrollees                 | 3,978                 | 2,064                 | 444                   |                     |
|                                                | No. absences (enrollees with >0), mean n days | 33.27                 | 42.17                 | 44.78                 |                     |
|                                                | No. absences (all enrollees), mean n days     | 25.65                 | 2.70                  | 1.01                  |                     |
|                                                | Estimated attributable absences and cost      |                       |                       |                       |                     |
|                                                | Absent days, simple mean                      | 6.49                  | 8.66                  | 1.08                  | 16.2                |
| Absent days, regression-adjusted mean (95% CI) | 5.3 (3.6-7.0)                                 | 10.5 (9.4-11.6)       | 1.0 (0.5-1.6)         | 16.8 (15.4-18.4)      |                     |
| Estimated cost, mean (95% CI)                  | \$744 (501-987)                               | \$1,476 (1,322-1,631) | \$142 (65-221)        | \$2,362 (2,164-2,582) |                     |
| Fire/burn                                      | Injury patients, n                            | 55                    | 302                   | 192                   |                     |
|                                                | With >0 absences, n patients                  | 43                    | 43                    | 4                     |                     |
|                                                | No. absences (patients with >0), mean n days  | 39.56                 | 34.15                 | 41.79                 |                     |
|                                                | No. absences (all patients), mean n days      | 30.92                 | 4.86                  | 0.87                  |                     |
|                                                | Control enrollees, n                          | 239                   | 1,456                 | 915                   |                     |
|                                                | With >0 absences, n enrollees                 | 192                   | 77                    | 15                    |                     |
|                                                | No. absences (enrollees with >0), mean n days | 34.99                 | 40.64                 | 40.52                 |                     |
|                                                | No. absences (all enrollees), mean n days     | 28.11                 | 2.15                  | 0.66                  |                     |

|                      |                                                |       |       |       |    |
|----------------------|------------------------------------------------|-------|-------|-------|----|
|                      | Estimated attributable absences and cost       |       |       |       |    |
|                      | Absent days, simple mean                       | NC    | NC    | NC    | NC |
|                      | Absent days, regression-adjusted mean (95% CI) | NC    | NC    | NC    | NC |
|                      | Estimated cost, mean (95% CI)                  | NC    | NC    | NC    | NC |
| Fire/flame           | Injury patients, n                             | 14    | 65    | 51    |    |
|                      | With >0 absences, n patients                   | 11    | 16    | 0     |    |
|                      | No. absences (patients with >0), mean n days   | 44.82 | 48.53 | 0.00  |    |
|                      | No. absences (all patients), mean n days       | 35.22 | 11.95 | 0.00  |    |
|                      | Control enrollees, n                           | 60    | 316   | 239   |    |
|                      | With >0 absences, n enrollees                  | 46    | 14    | 4     |    |
|                      | No. absences (enrollees with >0), mean n days  | 34.22 | 30.20 | 52.32 |    |
|                      | No. absences (all enrollees), mean n days      | 26.23 | 1.34  | 0.88  |    |
|                      | Estimated attributable absences and cost       |       |       |       |    |
|                      | Absent days, simple mean                       | NC    | NC    | NC    | NC |
|                      | Absent days, regression-adjusted mean (95% CI) | NC    | NC    | NC    | NC |
|                      | Estimated cost, mean (95% CI)                  | NC    | NC    | NC    | NC |
| Hot object/substance | Injury patients, n                             | 41    | 237   | 141   |    |
|                      | With >0 absences, n patients                   | 32    | 27    | 4     |    |
|                      | No. absences (patients with >0), mean n days   | 37.74 | 25.63 | 41.79 |    |
|                      | No. absences (all patients), mean n days       | 29.46 | 2.92  | 1.19  |    |
|                      | Control enrollees, n                           | 179   | 1,140 | 676   |    |
|                      | With >0 absences, n enrollees                  | 146   | 63    | 11    |    |
|                      | No. absences (enrollees with >0), mean n days  | 35.24 | 42.96 | 36.23 |    |
|                      | No. absences (all enrollees), mean n days      | 28.74 | 2.37  | 0.59  |    |
|                      | Estimated attributable absences and cost       |       |       |       |    |
|                      | Absent days, simple mean                       | NC    | NC    | NC    | NC |
|                      | Absent days, regression-adjusted mean (95% CI) | NC    | NC    | NC    | NC |
|                      | Estimated cost, mean (95% CI)                  | NC    | NC    | NC    | NC |
| Firearm              | Injury patients, n                             | 12    | 46    | 25    |    |
|                      | With >0 absences, n patients                   | 9     | 13    | 1     |    |
|                      | No. absences (patients with >0), mean n days   | 44.81 | 61.15 | 1.43  |    |
|                      | No. absences (all patients), mean n days       | 33.61 | 17.28 | 0.06  |    |
|                      | Control enrollees, n                           | 48    | 213   | 111   |    |
|                      | With >0 absences, n enrollees                  | 30    | 12    | 3     |    |
|                      | No. absences (enrollees with >0), mean n days  | 33.47 | 33.33 | 56.90 |    |
|                      | No. absences (all enrollees), mean n days      | 20.92 | 1.88  | 1.54  |    |
|                      | Estimated attributable absences and cost       |       |       |       |    |
|                      | Absent days, simple mean                       | NC    | NC    | NC    | NC |
|                      | Absent days, regression-adjusted mean (95% CI) | NC    | NC    | NC    | NC |
|                      | Estimated cost, mean (95% CI)                  | NC    | NC    | NC    | NC |
| Machinery            | Injury patients, n                             | 32    | 140   | 104   |    |
|                      | With >0 absences, n patients                   | 26    | 25    | 4     |    |
|                      | No. absences (patients with >0), mean n days   | 33.47 | 33.34 | 38.21 |    |
|                      | No. absences (all patients), mean n days       | 27.20 | 5.95  | 1.47  |    |
|                      | Control enrollees, n                           | 141   | 674   | 487   |    |
|                      | With >0 absences, n enrollees                  | 116   | 32    | 12    |    |
|                      | No. absences (enrollees with >0), mean n days  | 32.53 | 55.69 | 57.74 |    |
|                      | No. absences (all enrollees), mean n days      | 26.77 | 2.64  | 1.42  |    |
|                      | Estimated attributable absences and cost       |       |       |       |    |
|                      | Absent days, simple mean                       | NC    | NC    | NC    | NC |
|                      | Absent days, regression-adjusted mean (95% CI) | NC    | NC    | NC    | NC |

|                                                | Estimated cost, mean (95% CI)                 | NC                    | NC              | NC                    | NC   |
|------------------------------------------------|-----------------------------------------------|-----------------------|-----------------|-----------------------|------|
| Motor vehicle traffic                          | Injury patients, n                            | 659                   | 3,389           | 2,172                 |      |
|                                                | With >0 absences, n patients                  | 519                   | 796             | 83                    |      |
|                                                | No. absences (patients with >0), mean n days  | 44.34                 | 56.71           | 63.61                 |      |
|                                                | No. absences (all patients), mean n days      | 34.92                 | 13.32           | 2.43                  |      |
|                                                | Control enrollees, n                          | 2,905                 | 16,405          | 10,281                |      |
|                                                | With >0 absences, n enrollees                 | 2,276                 | 1,112           | 227                   |      |
|                                                | No. absences (enrollees with >0), mean n days | 33.41                 | 39.98           | 46.75                 |      |
|                                                | No. absences (all enrollees), mean n days     | 26.18                 | 2.71            | 1.03                  |      |
|                                                | Estimated attributable absences and cost      |                       |                 |                       |      |
|                                                | Absent days, simple mean                      | 8.74                  | 10.61           | 1.40                  | 20.8 |
| Absent days, regression-adjusted mean (95% CI) | 6.6 (4.1-9.2)                                 | 14.7 (12.5-16.9)      | 2.2 (0.9-3.4)   | 23.5 (20.9-26.0)      |      |
| Estimated cost, mean (95% CI)                  | \$931 (574-1,287)                             | \$2,065 (1,758-2,373) | \$302 (131-472) | \$3,298 (2,932-3,650) |      |
| Occupant                                       | Injury patients, n                            | 417                   | 2,297           | 1,442                 |      |
|                                                | With >0 absences, n patients                  | 328                   | 503             | 62                    |      |
|                                                | No. absences (patients with >0), mean n days  | 41.25                 | 56.88           | 66.65                 |      |
|                                                | No. absences (all patients), mean n days      | 32.44                 | 12.46           | 2.87                  |      |
|                                                | Control enrollees, n                          | 1,825                 | 11,084          | 6,806                 |      |
|                                                | With >0 absences, n enrollees                 | 1,407                 | 769             | 153                   |      |
|                                                | No. absences (enrollees with >0), mean n days | 32.37                 | 41.08           | 50.52                 |      |
|                                                | No. absences (all enrollees), mean n days     | 24.96                 | 2.85            | 1.14                  |      |
|                                                | Estimated attributable absences and cost      |                       |                 |                       |      |
|                                                | Absent days, simple mean                      | 7.48                  | 9.61            | 1.73                  | 18.8 |
| Absent days, regression-adjusted mean (95% CI) | 5.4 (2.5-8.2)                                 | 13.4 (10.7-16.0)      | 3.3 (1.2-5.4)   | 22.0 (18.8-25.2)      |      |
| Estimated cost, mean (95% CI)                  | \$755 (354-1,156)                             | \$1,881 (1,509-2,254) | \$463 (166-758) | \$3,099 (2,650-3,545) |      |
| Motorcyclist                                   | Injury patients, n                            | 117                   | 350             | 267                   |      |
|                                                | With >0 absences, n patients                  | 94                    | 133             | 5                     |      |
|                                                | No. absences (patients with >0), mean n days  | 58.61                 | 56.08           | 38.29                 |      |
|                                                | No. absences (all patients), mean n days      | 47.09                 | 21.31           | 0.72                  |      |
|                                                | Control enrollees, n                          | 518                   | 1,717           | 1,276                 |      |
|                                                | With >0 absences, n enrollees                 | 442                   | 83              | 27                    |      |
|                                                | No. absences (enrollees with >0), mean n days | 36.86                 | 35.65           | 36.22                 |      |
|                                                | No. absences (all enrollees), mean n days     | 31.45                 | 1.72            | 0.77                  |      |
|                                                | Estimated attributable absences and cost      |                       |                 |                       |      |
|                                                | Absent days, simple mean                      | 15.64                 | 19.59           | NC                    | 35.2 |
| Absent days, regression-adjusted mean (95% CI) | 12.4 (4.9-19.9)                               | 31.7 (18.6-44.8)      | NC              | 44.1 (33.2-54.8)      |      |
| Estimated cost, mean (95% CI)                  | \$1,741 (683-2,797)                           | \$4,456 (2,618-6,293) | NC              | \$6,196 (4,662-7,702) |      |
| Pedal cyclist                                  | Injury patients, n                            | 12                    | 39              | 21                    |      |
|                                                | With >0 absences, n patients                  | 10                    | 8               | 0                     |      |
|                                                | No. absences (patients with >0), mean n days  | 42.53                 | 54.11           | 0.00                  |      |
|                                                | No. absences (all patients), mean n days      | 35.44                 | 11.10           | 0.00                  |      |
|                                                | Control enrollees, n                          | 54                    | 190             | 97                    |      |
|                                                | With >0 absences, n enrollees                 | 41                    | 6               | 2                     |      |
|                                                | No. absences (enrollees with >0), mean n days | 35.93                 | 46.79           | 17.50                 |      |
|                                                | No. absences (all enrollees), mean n days     | 27.28                 | 1.48            | 0.36                  |      |
|                                                | Estimated attributable absences and cost      |                       |                 |                       |      |
|                                                | Absent days, simple mean                      | NC                    | NC              | NC                    | NC   |
| Absent days, regression-adjusted mean (95% CI) | NC                                            | NC                    | NC              | NC                    |      |
| Estimated cost, mean (95% CI)                  | NC                                            | NC                    | NC              | NC                    |      |
| Pedestrian                                     | Injury patients, n                            | 14                    | 64              | 36                    |      |
|                                                | With >0 absences, n patients                  | 11                    | 21              | 4                     |      |

|                                                |                                                |                       |       |                       |      |
|------------------------------------------------|------------------------------------------------|-----------------------|-------|-----------------------|------|
|                                                | No. absences (patients with >0), mean n days   | 32.75                 | 68.06 | 38.57                 |      |
|                                                | No. absences (all patients), mean n days       | 25.73                 | 22.33 | 4.29                  |      |
|                                                | Control enrollees, n                           | 63                    | 315   | 171                   |      |
|                                                | With >0 absences, n enrollees                  | 49                    | 20    | 3                     |      |
|                                                | No. absences (enrollees with >0), mean n days  | 33.52                 | 42.79 | 46.90                 |      |
|                                                | No. absences (all enrollees), mean n days      | 26.07                 | 2.72  | 0.82                  |      |
|                                                | Estimated attributable absences and cost       |                       |       |                       |      |
|                                                | Absent days, simple mean                       | NC                    | NC    | NC                    | NC   |
|                                                | Absent days, regression-adjusted mean (95% CI) | NC                    | NC    | NC                    | NC   |
|                                                | Estimated cost, mean (95% CI)                  | NC                    | NC    | NC                    | NC   |
| Unspecified MV                                 | Injury patients, n                             | 92                    | 599   | 381                   |      |
|                                                | With >0 absences, n patients                   | 70                    | 121   | 11                    |      |
|                                                | No. absences (patients with >0), mean n days   | 42.05                 | 56.87 | 72.79                 |      |
|                                                | No. absences (all patients), mean n days       | 32.00                 | 11.49 | 2.10                  |      |
|                                                | Control enrollees, n                           | 413                   | 2,907 | 1,810                 |      |
|                                                | With >0 absences, n enrollees                  | 312                   | 224   | 39                    |      |
|                                                | No. absences (enrollees with >0), mean n days  | 32.53                 | 37.42 | 42.47                 |      |
|                                                | No. absences (all enrollees), mean n days      | 24.57                 | 2.88  | 0.92                  |      |
|                                                | Estimated attributable absences and cost       |                       |       |                       |      |
|                                                | Absent days, simple mean                       | 7.43                  | 8.61  | NC                    | 16.0 |
| Absent days, regression-adjusted mean (95% CI) | NS                                             | 11.3 (7.2-15.3)       | NC    | 11.3 (7.2-15.3)       |      |
| Estimated cost, mean (95% CI)                  | NS                                             | \$1,586 (1,017-2,155) | NC    | \$1,586 (1,017-2,155) |      |
| Other pedal cyclist                            | Injury patients, n                             | 131                   | 513   | 298                   |      |
|                                                | With >0 absences, n patients                   | 96                    | 73    | 2                     |      |
|                                                | No. absences (patients with >0), mean n days   | 37.95                 | 41.06 | 54.64                 |      |
|                                                | No. absences (all patients), mean n days       | 27.81                 | 5.84  | 0.37                  |      |
|                                                | Control enrollees, n                           | 584                   | 2,509 | 1,434                 |      |
|                                                | With >0 absences, n enrollees                  | 444                   | 116   | 28                    |      |
|                                                | No. absences (enrollees with >0), mean n days  | 35.97                 | 34.72 | 54.21                 |      |
|                                                | No. absences (all enrollees), mean n days      | 27.35                 | 1.61  | 1.06                  |      |
|                                                | Estimated attributable absences and cost       |                       |       |                       |      |
|                                                | Absent days, simple mean                       | 0.46                  | 4.23  | NC                    | 4.7  |
| Absent days, regression-adjusted mean (95% CI) | NS                                             | 6.4 (3.0-9.8)         | NC    | 6.4 (3.0-9.8)         |      |
| Estimated cost, mean (95% CI)                  | NS                                             | \$900 (418-1,381)     | NC    | \$900 (418-1,381)     |      |
| Other pedestrian                               | Injury patients, n                             | 5                     | 17    | 14                    |      |
|                                                | With >0 absences, n patients                   | 5                     | 3     | 0                     |      |
|                                                | No. absences (patients with >0), mean n days   | 57.75                 | 53.57 | 0.00                  |      |
|                                                | No. absences (all patients), mean n days       | 57.75                 | 9.45  | 0.00                  |      |
|                                                | Control enrollees, n                           | 22                    | 82    | 67                    |      |
|                                                | With >0 absences, n enrollees                  | 19                    | 2     | 2                     |      |
|                                                | No. absences (enrollees with >0), mean n days  | 34.17                 | 67.86 | 110.00                |      |
|                                                | No. absences (all enrollees), mean n days      | 29.51                 | 1.66  | 3.28                  |      |
|                                                | Estimated attributable absences and cost       |                       |       |                       |      |
|                                                | Absent days, simple mean                       | NC                    | NC    | NC                    | NC   |
| Absent days, regression-adjusted mean (95% CI) | NC                                             | NC                    | NC    | NC                    |      |
| Estimated cost, mean (95% CI)                  | NC                                             | NC                    | NC    | NC                    |      |
| Other transport                                | Injury patients, n                             | 92                    | 422   | 292                   |      |
|                                                | With >0 absences, n patients                   | 66                    | 96    | 8                     |      |
|                                                | No. absences (patients with >0), mean n days   | 45.93                 | 53.86 | 25.36                 |      |
|                                                | No. absences (all patients), mean n days       | 32.95                 | 12.25 | 0.69                  |      |
|                                                | Control enrollees, n                           | 423                   | 2,057 | 1,378                 |      |

|                                                |                                                |                     |                       |                       |                       |
|------------------------------------------------|------------------------------------------------|---------------------|-----------------------|-----------------------|-----------------------|
|                                                | With >0 absences, n enrollees                  | 330                 | 101                   | 33                    |                       |
|                                                | No. absences (enrollees with >0), mean n days  | 35.05               | 39.98                 | 42.97                 |                       |
|                                                | No. absences (all enrollees), mean n days      | 27.34               | 1.96                  | 1.03                  |                       |
|                                                | Estimated attributable absences and cost       |                     |                       |                       |                       |
|                                                | Absent days, simple mean                       | 5.61                | 10.29                 | NC                    | 15.9                  |
|                                                | Absent days, regression-adjusted mean (95% CI) | NS                  | 17.8 (9.6-25.9)       | NC                    | 17.8 (9.6-25.9)       |
|                                                | Estimated cost, mean (95% CI)                  | NS                  | \$2,496 (1,344-3,647) | NC                    | \$2,496 (1,344-3,647) |
| Natural/enviromental                           | Injury patients, n                             | 38                  | 137                   | 87                    |                       |
|                                                | With >0 absences, n patients                   | 29                  | 15                    | 4                     |                       |
|                                                | No. absences (patients with >0), mean n days   | 41.37               | 42.57                 | 101.07                |                       |
|                                                | No. absences (all patients), mean n days       | 31.57               | 4.66                  | 4.65                  |                       |
|                                                | Control enrollees, n                           | 180                 | 675                   | 425                   |                       |
|                                                | With >0 absences, n enrollees                  | 147                 | 46                    | 10                    |                       |
|                                                | No. absences (enrollees with >0), mean n days  | 35.07               | 50.92                 | 42.36                 |                       |
|                                                | No. absences (all enrollees), mean n days      | 28.64               | 3.47                  | 1.00                  |                       |
|                                                | Estimated attributable absences and cost       |                     |                       |                       |                       |
| Absent days, simple mean                       | NC                                             | NC                  | NC                    | NC                    |                       |
| Absent days, regression-adjusted mean (95% CI) | NC                                             | NC                  | NC                    | NC                    |                       |
| Estimated cost, mean (95% CI)                  | NC                                             | NC                  | NC                    | NC                    |                       |
| Bites and stings                               | Injury patients, n                             | 279                 | 1,409                 | 903                   |                       |
|                                                | With >0 absences, n patients                   | 206                 | 125                   | 34                    |                       |
|                                                | No. absences (patients with >0), mean n days   | 37.67               | 39.60                 | 48.91                 |                       |
|                                                | No. absences (all patients), mean n days       | 27.81               | 3.51                  | 1.84                  |                       |
|                                                | Control enrollees, n                           | 1,251               | 6,892                 | 4,366                 |                       |
|                                                | With >0 absences, n enrollees                  | 959                 | 423                   | 98                    |                       |
|                                                | No. absences (enrollees with >0), mean n days  | 34.06               | 38.64                 | 50.81                 |                       |
|                                                | No. absences (all enrollees), mean n days      | 26.11               | 2.37                  | 1.14                  |                       |
|                                                | Estimated attributable absences and cost       |                     |                       |                       |                       |
| Absent days, simple mean                       | 1.70                                           | 1.14                | NC                    | 2.8                   |                       |
| Absent days, regression-adjusted mean (95% CI) | NS                                             | 1.5 (0.4-2.6)       | NC                    | 1.5 (0.4-2.6)         |                       |
| Estimated cost, mean (95% CI)                  | NS                                             | \$210 (51-370)      | NC                    | \$210 (51-370)        |                       |
| Overexertion                                   | Injury patients, n                             | 516                 | 2,763                 | 1,860                 |                       |
|                                                | With >0 absences, n patients                   | 402                 | 487                   | 75                    |                       |
|                                                | No. absences (patients with >0), mean n days   | 37.57               | 49.64                 | 64.00                 |                       |
|                                                | No. absences (all patients), mean n days       | 29.27               | 8.75                  | 2.58                  |                       |
|                                                | Control enrollees, n                           | 2,308               | 13,416                | 8,850                 |                       |
|                                                | With >0 absences, n enrollees                  | 1,739               | 818                   | 207                   |                       |
|                                                | No. absences (enrollees with >0), mean n days  | 32.59               | 42.20                 | 51.07                 |                       |
|                                                | No. absences (all enrollees), mean n days      | 24.55               | 2.57                  | 1.19                  |                       |
|                                                | Estimated attributable absences and cost       |                     |                       |                       |                       |
| Absent days, simple mean                       | 4.72                                           | 6.18                | 1.39                  | 12.3                  |                       |
| Absent days, regression-adjusted mean (95% CI) | 3.8 (1.4-6.2)                                  | 7.8 (6.2-9.3)       | 1.2 (0.2-2.1)         | 12.7 (10.6-14.8)      |                       |
| Estimated cost, mean (95% CI)                  | \$533 (200-868)                                | \$1,091 (877-1,305) | \$162 (32-290)        | \$1,786 (1,488-2,084) |                       |
| Poisoning                                      | Injury patients, n                             | 57                  | 299                   | 176                   |                       |
|                                                | With >0 absences, n patients                   | 45                  | 80                    | 11                    |                       |
|                                                | No. absences (patients with >0), mean n days   | 62.40               | 51.06                 | 34.68                 |                       |
|                                                | No. absences (all patients), mean n days       | 49.26               | 13.66                 | 2.17                  |                       |
|                                                | Control enrollees, n                           | 248                 | 1,429                 | 817                   |                       |
|                                                | With >0 absences, n enrollees                  | 207                 | 121                   | 23                    |                       |
| No. absences (enrollees with >0), mean n days  | 43.78                                          | 44.46               | 41.37                 |                       |                       |
| No. absences (all enrollees), mean n days      | 36.54                                          | 3.76                | 1.16                  |                       |                       |

|                               |                                                |               |                       |               |                       |
|-------------------------------|------------------------------------------------|---------------|-----------------------|---------------|-----------------------|
|                               | Estimated attributable absences and cost       |               |                       |               |                       |
|                               | Absent days, simple mean                       | NC            | 9.90                  | NC            | 9.9                   |
|                               | Absent days, regression-adjusted mean (95% CI) | NC            | 13.0 (7.3-18.7)       | NC            | 13.0 (7.3-18.7)       |
|                               | Estimated cost, mean (95% CI)                  | NC            | \$1,826 (1,028-2,625) | NC            | \$1,826 (1,028-2,625) |
| Struck by/against             | Injury patients, n                             | 640           | 3,224                 | 2,020         |                       |
|                               | With >0 absences, n patients                   | 515           | 450                   | 61            |                       |
|                               | No. absences (patients with >0), mean n days   | 35.17         | 46.05                 | 76.87         |                       |
|                               | No. absences (all patients), mean n days       | 28.30         | 6.43                  | 2.32          |                       |
|                               | Control enrollees, n                           | 2,830         | 15,635                | 9,623         |                       |
|                               | With >0 absences, n enrollees                  | 2,211         | 859                   | 194           |                       |
|                               | No. absences (enrollees with >0), mean n days  | 33.57         | 38.42                 | 51.53         |                       |
|                               | No. absences (all enrollees), mean n days      | 26.23         | 2.11                  | 1.04          |                       |
|                               | Estimated attributable absences and cost       |               |                       |               |                       |
|                               | Absent days, simple mean                       | 2.07          | 4.32                  | 1.28          | 7.7                   |
|                               | Absent days, regression-adjusted mean (95% CI) | NS            | 4.6 (3.6-5.6)         | NS            | 4.6 (3.6-5.6)         |
|                               | Estimated cost, mean (95% CI)                  | NS            | \$644 (509-780)       | NS            | \$644 (509-780)       |
| Suffocation                   | Injury patients, n                             | 7             | 35                    | 29            |                       |
|                               | With >0 absences, n patients                   | 5             | 5                     | 0             |                       |
|                               | No. absences (patients with >0), mean n days   | 26.89         | 56.57                 | 0.00          |                       |
|                               | No. absences (all patients), mean n days       | 19.21         | 8.08                  | 0.00          |                       |
|                               | Control enrollees, n                           | 29            | 173                   | 143           |                       |
|                               | With >0 absences, n enrollees                  | 24            | 7                     | 5             |                       |
|                               | No. absences (enrollees with >0), mean n days  | 29.22         | 40.20                 | 34.14         |                       |
|                               | No. absences (all enrollees), mean n days      | 24.18         | 1.63                  | 1.19          |                       |
|                               | Estimated attributable absences and cost       |               |                       |               |                       |
|                               | Absent days, simple mean                       | NC            | NC                    | NC            | NC                    |
|                               | Absent days, regression-adjusted mean (95% CI) | NC            | NC                    | NC            | NC                    |
|                               | Estimated cost, mean (95% CI)                  | NC            | NC                    | NC            | NC                    |
| Other specified, classifiable | Injury patients, n                             | 251           | 1,181                 | 806           |                       |
|                               | With >0 absences, n patients                   | 177           | 120                   | 32            |                       |
|                               | No. absences (patients with >0), mean n days   | 34.37         | 48.32                 | 33.44         |                       |
|                               | No. absences (all patients), mean n days       | 24.23         | 4.91                  | 1.33          |                       |
|                               | Control enrollees, n                           | 1,138         | 5,716                 | 3,860         |                       |
|                               | With >0 absences, n enrollees                  | 854           | 324                   | 93            |                       |
|                               | No. absences (enrollees with >0), mean n days  | 34.52         | 40.86                 | 45.58         |                       |
|                               | No. absences (all enrollees), mean n days      | 25.90         | 2.32                  | 1.10          |                       |
|                               | Estimated attributable absences and cost       |               |                       |               |                       |
|                               | Absent days, simple mean                       | -1.67         | 2.59                  | NC            | .9                    |
|                               | Absent days, regression-adjusted mean (95% CI) | NS            | 3.1 (1.5-4.6)         | NC            | 3.1 (1.5-4.6)         |
|                               | Estimated cost, mean (95% CI)                  | NS            | \$433 (214-651)       | NC            | \$433 (214-651)       |
| Other specified NEC           | Injury patients, n                             | 264           | 1,524                 | 1,071         |                       |
|                               | With >0 absences, n patients                   | 205           | 257                   | 50            |                       |
|                               | No. absences (patients with >0), mean n days   | 43.18         | 50.06                 | 57.21         |                       |
|                               | No. absences (all patients), mean n days       | 33.53         | 8.44                  | 2.67          |                       |
|                               | Control enrollees, n                           | 1,215         | 7,372                 | 5,095         |                       |
|                               | With >0 absences, n enrollees                  | 919           | 420                   | 109           |                       |
|                               | No. absences (enrollees with >0), mean n days  | 34.11         | 41.20                 | 52.02         |                       |
|                               | No. absences (all enrollees), mean n days      | 25.80         | 2.35                  | 1.11          |                       |
|                               | Estimated attributable absences and cost       |               |                       |               |                       |
|                               | Absent days, simple mean                       | 7.73          | 6.09                  | 1.56          | 15.4                  |
|                               | Absent days, regression-adjusted mean (95% CI) | 5.4 (1.6-9.2) | 6.7 (4.8-8.5)         | 1.4 (0.2-2.6) | 13.5 (10.3-16.7)      |

|                                                | Estimated cost, mean (95% CI)                 | \$758 (218-1,299) | \$935 (678-1,192) | \$200 (28-370)        | \$1,893 (1,452-2,349) |
|------------------------------------------------|-----------------------------------------------|-------------------|-------------------|-----------------------|-----------------------|
| Unspecified                                    | Injury patients, n                            | 226               | 1,418             | 962                   |                       |
|                                                | With >0 absences, n patients                  | 152               | 250               | 31                    |                       |
|                                                | No. absences (patients with >0), mean n days  | 37.28             | 49.58             | 51.34                 |                       |
|                                                | No. absences (all patients), mean n days      | 25.07             | 8.74              | 1.65                  |                       |
|                                                | Control enrollees, n                          | 968               | 6,885             | 4,563                 |                       |
|                                                | With >0 absences, n enrollees                 | 680               | 473               | 100                   |                       |
|                                                | No. absences (enrollees with >0), mean n days | 31.19             | 43.22             | 43.75                 |                       |
|                                                | No. absences (all enrollees), mean n days     | 21.91             | 2.97              | 0.96                  |                       |
|                                                | Estimated attributable absences and cost      |                   |                   |                       |                       |
|                                                | Absent days, simple mean                      | 3.16              | 5.77              | NC                    | 8.9                   |
| Absent days, regression-adjusted mean (95% CI) | NS                                            | 7.1 (5.0-9.1)     | NC                | 7.1 (5.0-9.1)         |                       |
| Estimated cost, mean (95% CI)                  | NS                                            | \$995 (707-1,282) | NC                | \$995 (707-1,282)     |                       |
| Adverse effects                                | Injury patients, n                            | 4                 | 35                | 20                    |                       |
|                                                | With >0 absences, n patients                  | 4                 | 4                 | 0                     |                       |
|                                                | No. absences (patients with >0), mean n days  | 103.94            | 94.64             | 0.00                  |                       |
|                                                | No. absences (all patients), mean n days      | 103.94            | 10.82             | 0.00                  |                       |
|                                                | Control enrollees, n                          | 18                | 174               | 95                    |                       |
|                                                | With >0 absences, n enrollees                 | 15                | 10                | 2                     |                       |
|                                                | No. absences (enrollees with >0), mean n days | 28.71             | 36.50             | 68.57                 |                       |
|                                                | No. absences (all enrollees), mean n days     | 23.92             | 2.10              | 1.44                  |                       |
|                                                | Estimated attributable absences and cost      |                   |                   |                       |                       |
|                                                | Absent days, simple mean                      | NC                | NC                | NC                    | NC                    |
| Absent days, regression-adjusted mean (95% CI) | NC                                            | NC                | NC                | NC                    |                       |
| Estimated cost, mean (95% CI)                  | NC                                            | NC                | NC                | NC                    |                       |
| Ecode missing                                  | Injury patients, n                            | 6,146             | 40,937            | 25,682                |                       |
|                                                | With >0 absences, n patients                  | 4,535             | 6,553             | 1,088                 |                       |
|                                                | No. absences (patients with >0), mean n days  | 37.84             | 49.24             | 53.87                 |                       |
|                                                | No. absences (all patients), mean n days      | 27.92             | 7.88              | 2.28                  |                       |
|                                                | Control enrollees, n                          | 27,545            | 199,633           | 123,078               |                       |
|                                                | With >0 absences, n enrollees                 | 20,033            | 12,101            | 2,798                 |                       |
|                                                | No. absences (enrollees with >0), mean n days | 31.89             | 41.48             | 46.25                 |                       |
|                                                | No. absences (all enrollees), mean n days     | 23.19             | 2.51              | 1.05                  |                       |
|                                                | Estimated attributable absences and cost      |                   |                   |                       |                       |
|                                                | Absent days, simple mean                      | 4.73              | 5.37              | 1.23                  | 11.3                  |
| Absent days, regression-adjusted mean (95% CI) | 3.6 (2.9-4.3)                                 | 6.3 (6.0-6.7)     | 1.3 (1.0-1.5)     | 11.2 (10.6-11.8)      |                       |
| Estimated cost, mean (95% CI)                  | \$508 (406-607)                               | \$889 (839-939)   | \$180 (145-215)   | \$1,576 (1,493-1,658) |                       |
| Total                                          | Injury patients, n                            | 11,282            | 67,821            | 43,109                |                       |
|                                                | With >0 absences, n patients                  | 8,493             | 11,092            | 1,704                 |                       |
|                                                | No. absences (patients with >0), mean n days  | 38.64             | 49.96             | 54.54                 |                       |
|                                                | No. absences (all patients), mean n days      | 29.09             | 8.17              | 2.16                  |                       |
|                                                | Control enrollees, n                          | 50,409            | 330,167           | 206,201               |                       |
|                                                | With >0 absences, n enrollees                 | 37,576            | 20,018            | 4,633                 |                       |
|                                                | No. absences (enrollees with >0), mean n days | 32.73             | 41.32             | 46.78                 |                       |
|                                                | No. absences (all enrollees), mean n days     | 24.40             | 2.51              | 1.05                  |                       |
|                                                | Estimated attributable absences and cost      |                   |                   |                       |                       |
|                                                | Absent days, simple mean                      | 4.69              | 5.66              | 1.11                  | 11.5                  |
| Absent days, regression-adjusted mean (95% CI) | 3.6 (3.1-4.1)                                 | 6.6 (6.3-6.9)     | 1.1 (0.9-1.3)     | 11.3 (10.8-11.8)      |                       |
| Estimated cost, mean (95% CI)                  | \$505 (429-581)                               | \$928 (889-966)   | \$153 (127-179)   | \$1,586 (1,518-1,652) |                       |

Notes. All costs are 2015 USD. NC = not calculated, due to low number of observations (<50 injury or control enrollees with >0 absences) in the data source. NEC = Not elsewhere classifiable. NS = not significant, the regression-adjusted attributable number of lost work days due to the injury type was not statistically significantly higher among injured patients compared to control enrollees.

Values are mean (95% confidence interval [CI] or prediction interval [PI])—in the case that multiple estimates by absence type were probabilistically combined). For injury types with just one attributable absence type value reported, "Total" days reflects that absence type's mean (95% CI) regression-adjusted value. Otherwise, variance for "Total" days estimates was based on a probabilistic combination of variance for multiple absence type estimates (e.g., workplace absence + short-term disability absence estimates for Cut/pierce injuries) using Excel Palisade @RISK (Ithaca, NY). For those calculations, 1,000 sums drawn from Pert distributions representing each absence type—with mean (95% CI) estimates of absent days by type included as the distributions' most likely, minimum, and maximum values—were computed, and the middle 95% of resulting values comprise the reported PI range. Total cost was assessed as the mean number of days and 95% CI or PI values multiplied by the estimated value of lost work days described in the Methods text (\$141).

Source data: MarketScan Health and Productivity Management dataset, 2014-2016. Injury classification is based on the ICD-9-CM E-code Matrix ([www.cdc.gov/nchs/injury/injury\\_tools.htm](http://www.cdc.gov/nchs/injury/injury_tools.htm)).



**STable 2. Number of injury and control enrollees and estimated average per-person one-year number and associated value of lost work days due to non-fatal injuries (by body region) initially treated in an emergency department during October 1, 2014 through September 30, 2015, Marketscan – Employer health insurance enrollees age 18-64 years, ED disposition: All (2015 USD)**

| Body Region                                    | Body Region                                    | Measure                                       | Work absence          | Short-term disability | Workers' compensation | Total days and cost |
|------------------------------------------------|------------------------------------------------|-----------------------------------------------|-----------------------|-----------------------|-----------------------|---------------------|
| Head and neck                                  | Traumatic brain injury                         | Injury patients, n                            | 293                   | 1,764                 | 1,063                 |                     |
|                                                |                                                | With >0 absences, n patients                  | 224                   | 339                   | 39                    |                     |
|                                                |                                                | No. absences (patients with >0), mean n days  | 42.18                 | 55.97                 | 50.22                 |                     |
|                                                |                                                | No. absences (all patients), mean n days      | 32.25                 | 10.76                 | 1.84                  |                     |
|                                                |                                                | Control enrollees, n                          | 1,292                 | 8,563                 | 5,017                 |                     |
|                                                |                                                | With >0 absences, n enrollees                 | 948                   | 541                   | 98                    |                     |
|                                                |                                                | No. absences (enrollees with >0), mean n days | 32.76                 | 40.80                 | 51.34                 |                     |
|                                                |                                                | No. absences (all enrollees), mean n days     | 24.03                 | 2.58                  | 1.00                  |                     |
|                                                |                                                | Estimated attributable absences and cost      |                       |                       |                       |                     |
|                                                | Absent days, simple mean                       | 8.22                                          | 8.18                  | NC                    | 16.4                  |                     |
|                                                | Absent days, regression-adjusted mean (95% CI) | 7.6 (3.3-11.9)                                | 12.2 (9.2-15.2)       | NC                    | 19.8 (15.8-23.5)      |                     |
|                                                | Estimated cost, mean (95% CI)                  | \$1,066 (464-1,668)                           | \$1,721 (1,299-2,141) | NC                    | \$2,787 (2,227-3,304) |                     |
|                                                | Other head, face, and neck                     | Injury patients, n                            | 1,591                 | 9,684                 | 5,918                 |                     |
|                                                |                                                | With >0 absences, n patients                  | 1,190                 | 1,114                 | 227                   |                     |
|                                                |                                                | No. absences (patients with >0), mean n days  | 34.21                 | 45.81                 | 47.63                 |                     |
| No. absences (all patients), mean n days       |                                                | 25.59                                         | 5.27                  | 1.83                  |                       |                     |
| Control enrollees, n                           |                                                | 7,117                                         | 47,100                | 28,302                |                       |                     |
| With >0 absences, n enrollees                  |                                                | 5,347                                         | 2,694                 | 627                   |                       |                     |
| No. absences (enrollees with >0), mean n days  |                                                | 32.42                                         | 40.73                 | 43.48                 |                       |                     |
| No. absences (all enrollees), mean n days      |                                                | 24.36                                         | 2.33                  | 0.96                  |                       |                     |
| Estimated attributable absences and cost       |                                                |                                               |                       |                       |                       |                     |
| Absent days, simple mean                       | 1.23                                           | 2.94                                          | 0.87                  | 5.0                   |                       |                     |
| Absent days, regression-adjusted mean (95% CI) | NS                                             | 3.2 (2.6-3.8)                                 | 0.8 (0.4-1.3)         | 4.0 (3.5-4.6)         |                       |                     |
| Estimated cost, mean (95% CI)                  | NS                                             | \$450 (370-530)                               | \$117 (56-177)        | \$567 (487-643)       |                       |                     |
| Head and neck, Total                           | Injury patients, n                             | 1,884                                         | 11,448                | 6,981                 |                       |                     |
|                                                | With >0 absences, n patients                   | 1,414                                         | 1,453                 | 266                   |                       |                     |
|                                                | No. absences (patients with >0), mean n days   | 35.47                                         | 48.18                 | 48.01                 |                       |                     |
|                                                | No. absences (all patients), mean n days       | 26.62                                         | 6.12                  | 1.83                  |                       |                     |
|                                                | Control enrollees, n                           | 8,409                                         | 55,663                | 33,319                |                       |                     |
|                                                | With >0 absences, n enrollees                  | 6,295                                         | 3,235                 | 725                   |                       |                     |
|                                                | No. absences (enrollees with >0), mean n days  | 32.47                                         | 40.74                 | 44.54                 |                       |                     |
|                                                | No. absences (all enrollees), mean n days      | 24.31                                         | 2.37                  | 0.97                  |                       |                     |
|                                                | Estimated attributable absences and cost       |                                               |                       |                       |                       |                     |
| Absent days, simple mean                       | 2.31                                           | 3.75                                          | 0.86                  | 6.9                   |                       |                     |
| Absent days, regression-adjusted mean (95% CI) | 1.9 (0.6-3.1)                                  | 4.4 (3.8-5.0)                                 | 0.8 (0.4-1.2)         | 7.0 (6.0-8.1)         |                       |                     |
| Estimated cost, mean (95% CI)                  | \$262 (89-434)                                 | \$619 (531-706)                               | \$107 (52-162)        | \$987 (841-1,134)     |                       |                     |
| Spine and back                                 | Spinal cord (SCI)                              | Injury patients, n                            | 0                     | 14                    | 7                     |                     |
|                                                |                                                | With >0 absences, n patients                  | 0                     | 6                     | 0                     |                     |
|                                                |                                                | No. absences (patients with >0), mean n days  | 0.00                  | 119.52                | 0.00                  |                     |
|                                                |                                                | No. absences (all patients), mean n days      | 0.00                  | 51.22                 | 0.00                  |                     |
|                                                |                                                | Control enrollees, n                          | 0                     | 64                    | 31                    |                     |
|                                                |                                                | With >0 absences, n enrollees                 | 0                     | 6                     | 1                     |                     |
|                                                |                                                | No. absences (enrollees with >0), mean n days | 0.00                  | 56.90                 | 25.71                 |                     |
|                                                |                                                | No. absences (all enrollees), mean n days     | 0.00                  | 5.33                  | 0.83                  |                     |
|                                                |                                                | Estimated attributable absences and cost      |                       |                       |                       |                     |
|                                                | Absent days, simple mean                       | NC                                            | NC                    | NC                    | NC                    |                     |
|                                                | Absent days, regression-adjusted mean (95% CI) | NC                                            | NC                    | NC                    | NC                    |                     |
|                                                | Estimated cost, mean (95% CI)                  | NC                                            | NC                    | NC                    | NC                    |                     |
| Vertebral column (VCI)                         | Injury patients, n                             | 1,234                                         | 7,382                 | 4,784                 |                       |                     |

|             |                       |                                                |                   |                       |                 |                       |
|-------------|-----------------------|------------------------------------------------|-------------------|-----------------------|-----------------|-----------------------|
|             |                       | With >0 absences, n patients                   | 935               | 1,397                 | 224             |                       |
|             |                       | No. absences (patients with >0), mean n days   | 39.83             | 49.89                 | 57.16           |                       |
|             |                       | No. absences (all patients), mean n days       | 30.18             | 9.44                  | 2.68            |                       |
|             |                       | Control enrollees, n                           | 5,534             | 35,872                | 22,805          |                       |
|             |                       | With >0 absences, n enrollees                  | 4,043             | 2,381                 | 448             |                       |
|             |                       | No. absences (enrollees with >0), mean n days  | 32.13             | 39.92                 | 47.47           |                       |
|             |                       | No. absences (all enrollees), mean n days      | 23.47             | 2.65                  | 0.93            |                       |
|             |                       | Estimated attributable absences and cost       |                   |                       |                 |                       |
|             |                       | Absent days, simple mean                       | 6.71              | 6.79                  | 1.75            | 15.3                  |
|             |                       | Absent days, regression-adjusted mean (95% CI) | 5.4 (3.6-7.2)     | 8.4 (7.4-9.4)         | 2.3 (1.5-3.2)   | 16.1 (14.6-17.7)      |
|             |                       | Estimated cost, mean (95% CI)                  | \$754 (503-1,005) | \$1,184 (1,046-1,320) | \$328 (210-444) | \$2,265 (2,053-2,491) |
|             | Spine and back, Total | Injury patients, n                             | 1,234             | 7,396                 | 4,791           |                       |
|             |                       | With >0 absences, n patients                   | 935               | 1,403                 | 224             |                       |
|             |                       | No. absences (patients with >0), mean n days   | 39.83             | 50.19                 | 57.16           |                       |
|             |                       | No. absences (all patients), mean n days       | 30.18             | 9.52                  | 2.67            |                       |
|             |                       | Control enrollees, n                           | 5,534             | 35,936                | 22,836          |                       |
|             |                       | With >0 absences, n enrollees                  | 4,043             | 2,387                 | 449             |                       |
|             |                       | No. absences (enrollees with >0), mean n days  | 32.13             | 39.97                 | 47.42           |                       |
|             |                       | No. absences (all enrollees), mean n days      | 23.47             | 2.65                  | 0.93            |                       |
|             |                       | Estimated attributable absences and cost       |                   |                       |                 |                       |
|             |                       | Absent days, simple mean                       | 6.71              | 6.87                  | 1.74            | 15.3                  |
|             |                       | Absent days, regression-adjusted mean (95% CI) | 5.4 (3.6-7.2)     | 8.5 (7.5-9.5)         | 2.3 (1.5-3.2)   | 16.2 (14.5-17.7)      |
|             |                       | Estimated cost, mean (95% CI)                  | \$754 (503-1,005) | \$1,195 (1,057-1,333) | \$326 (210-444) | \$2,275 (2,045-2,487) |
| Torso       | Torso                 | Injury patients, n                             | 919               | 5,477                 | 3,592           |                       |
|             |                       | With >0 absences, n patients                   | 698               | 984                   | 142             |                       |
|             |                       | No. absences (patients with >0), mean n days   | 40.67             | 50.97                 | 58.35           |                       |
|             |                       | No. absences (all patients), mean n days       | 30.89             | 9.16                  | 2.31            |                       |
|             |                       | Control enrollees, n                           | 4,079             | 26,667                | 17,142          |                       |
|             |                       | With >0 absences, n enrollees                  | 3,076             | 1,647                 | 428             |                       |
|             |                       | No. absences (enrollees with >0), mean n days  | 33.67             | 42.23                 | 48.36           |                       |
|             |                       | No. absences (all enrollees), mean n days      | 25.39             | 2.61                  | 1.21            |                       |
|             |                       | Estimated attributable absences and cost       |                   |                       |                 |                       |
|             |                       | Absent days, simple mean                       | 5.50              | 6.55                  | 1.10            | 13.2                  |
|             |                       | Absent days, regression-adjusted mean (95% CI) | 3.7 (1.7-5.6)     | 7.9 (6.8-9.1)         | 0.9 (0.3-1.5)   | 12.5 (10.8-14.2)      |
|             |                       | Estimated cost, mean (95% CI)                  | \$513 (242-783)   | \$1,115 (952-1,278)   | \$131 (48-215)  | \$1,759 (1,513-1,992) |
| Extremities | Upper extremities     | Injury patients, n                             | 3,640             | 21,173                | 13,532          |                       |
|             |                       | With >0 absences, n patients                   | 2,735             | 3,261                 | 508             |                       |
|             |                       | No. absences (patients with >0), mean n days   | 37.63             | 48.74                 | 57.76           |                       |
|             |                       | No. absences (all patients), mean n days       | 28.27             | 7.51                  | 2.17            |                       |
|             |                       | Control enrollees, n                           | 16,383            | 103,213               | 64,948          |                       |
|             |                       | With >0 absences, n enrollees                  | 12,254            | 5,840                 | 1,449           |                       |
|             |                       | No. absences (enrollees with >0), mean n days  | 32.62             | 41.57                 | 46.87           |                       |
|             |                       | No. absences (all enrollees), mean n days      | 24.40             | 2.35                  | 1.05            |                       |
|             |                       | Estimated attributable absences and cost       |                   |                       |                 |                       |
|             |                       | Absent days, simple mean                       | 3.87              | 5.16                  | 1.12            | 10.2                  |
|             |                       | Absent days, regression-adjusted mean (95% CI) | 3.1 (2.1-4.0)     | 6.2 (5.7-6.6)         | 1.1 (0.8-1.4)   | 10.3 (9.5-11.1)       |
|             |                       | Estimated cost, mean (95% CI)                  | \$429 (301-557)   | \$865 (799-931)       | \$155 (108-201) | \$1,448 (1,342-1,557) |
|             | Lower extremities     | Injury patients, n                             | 2,717             | 17,190                | 10,910          |                       |
|             |                       | With >0 absences, n patients                   | 2,034             | 3,276                 | 406             |                       |
|             |                       | No. absences (patients with >0), mean n days   | 40.60             | 52.03                 | 53.97           |                       |
|             |                       | No. absences (all patients), mean n days       | 30.40             | 9.92                  | 2.01            |                       |
|             |                       | Control enrollees, n                           | 12,053            | 83,662                | 52,147          |                       |
|             |                       | With >0 absences, n enrollees                  | 8,952             | 5,341                 | 1,183           |                       |
|             |                       | No. absences (enrollees with >0), mean n days  | 32.63             | 41.26                 | 45.67           |                       |
|             |                       | No. absences (all enrollees), mean n days      | 24.24             | 2.63                  | 1.04            |                       |
|             |                       | Estimated attributable absences and cost       |                   |                       |                 |                       |

|                  |                               |                                                |                   |                       |                 |                       |
|------------------|-------------------------------|------------------------------------------------|-------------------|-----------------------|-----------------|-----------------------|
|                  |                               | Absent days, simple mean                       | 6.16              | 7.29                  | 0.97            | 14.4                  |
|                  |                               | Absent days, regression-adjusted mean (95% CI) | 4.6 (3.5-5.8)     | 8.6 (8.0-9.2)         | 1.0 (0.6-1.3)   | 14.2 (13.3-15.2)      |
|                  |                               | Estimated cost, mean (95% CI)                  | \$652 (491-814)   | \$1,208 (1,122-1,294) | \$138 (89-187)  | \$1,998 (1,864-2,132) |
|                  | Torso, Total                  | Injury patients, n                             | 6,357             | 38,363                | 24,442          |                       |
|                  |                               | With >0 absences, n patients                   | 4,769             | 6,537                 | 914             |                       |
|                  |                               | No. absences (patients with >0), mean n days   | 38.90             | 50.39                 | 56.08           |                       |
|                  |                               | No. absences (all patients), mean n days       | 29.18             | 8.59                  | 2.10            |                       |
|                  |                               | Control enrollees, n                           | 28,436            | 186,875               | 117,095         |                       |
|                  |                               | With >0 absences, n enrollees                  | 21,206            | 11,181                | 2,632           |                       |
|                  |                               | No. absences (enrollees with >0), mean n days  | 32.63             | 41.42                 | 46.33           |                       |
|                  |                               | No. absences (all enrollees), mean n days      | 24.33             | 2.48                  | 1.04            |                       |
|                  |                               | Estimated attributable absences and cost       |                   |                       |                 |                       |
|                  |                               | Absent days, simple mean                       | 4.85              | 6.11                  | 1.06            | 12.0                  |
|                  |                               | Absent days, regression-adjusted mean (95% CI) | 3.7 (3.0-4.5)     | 7.2 (6.9-7.6)         | 1.0 (0.8-1.3)   | 12.0 (11.4-12.6)      |
|                  |                               | Estimated cost, mean (95% CI)                  | \$524 (425-626)   | \$1,018 (965-1,071)   | \$145 (111-177) | \$1,687 (1,598-1,771) |
|                  | Unclassifiable by site        | Other or multiple                              |                   |                       |                 |                       |
|                  |                               | Injury patients, n                             | 304               | 1,719                 | 1,146           |                       |
|                  |                               | With >0 absences, n patients                   | 231               | 284                   | 51              |                       |
|                  |                               | No. absences (patients with >0), mean n days   | 39.67             | 48.34                 | 59.27           |                       |
|                  |                               | No. absences (all patients), mean n days       | 30.15             | 7.99                  | 2.64            |                       |
|                  |                               | Control enrollees, n                           | 1,350             | 8,375                 | 5,469           |                       |
|                  |                               | With >0 absences, n enrollees                  | 990               | 547                   | 147             |                       |
|                  |                               | No. absences (enrollees with >0), mean n days  | 33.10             | 45.76                 | 47.70           |                       |
|                  |                               | No. absences (all enrollees), mean n days      | 24.27             | 2.99                  | 1.28            |                       |
|                  |                               | Estimated attributable absences and cost       |                   |                       |                 |                       |
|                  |                               | Absent days, simple mean                       | 5.88              | 5.00                  | 1.36            | 12.2                  |
|                  |                               | Absent days, regression-adjusted mean (95% CI) | 4.1 (1.0-7.3)     | 6.3 (4.4-8.2)         | 1.6 (0.2-3.0)   | 12.0 (9.2-14.7)       |
|                  |                               | Estimated cost, mean (95% CI)                  | \$581 (142-1,019) | \$887 (624-1,150)     | \$224 (28-419)  | \$1,691 (1,288-2,071) |
|                  | System-wide                   | Injury patients, n                             | 584               | 3,418                 | 2,157           |                       |
|                  |                               | With >0 absences, n patients                   | 446               | 431                   | 107             |                       |
|                  |                               | No. absences (patients with >0), mean n days   | 39.74             | 47.49                 | 44.82           |                       |
|                  |                               | No. absences (all patients), mean n days       | 30.35             | 5.99                  | 2.22            |                       |
|                  |                               | Control enrollees, n                           | 2,601             | 16,651                | 10,340          |                       |
|                  |                               | With >0 absences, n enrollees                  | 1,966             | 1,021                 | 252             |                       |
|                  |                               | No. absences (enrollees with >0), mean n days  | 34.23             | 41.36                 | 53.58           |                       |
|                  |                               | No. absences (all enrollees), mean n days      | 25.88             | 2.54                  | 1.31            |                       |
|                  |                               | Estimated attributable absences and cost       |                   |                       |                 |                       |
|                  |                               | Absent days, simple mean                       | 4.47              | 3.45                  | 0.91            | 8.8                   |
|                  |                               | Absent days, regression-adjusted mean (95% CI) | 3.8 (1.4-6.2)     | 2.9 (2.0-3.8)         | 1.2 (0.2-2.2)   | 7.9 (5.9-9.8)         |
|                  |                               | Estimated cost, mean (95% CI)                  | \$531 (194-869)   | \$405 (284-527)       | \$172 (30-314)  | \$1,108 (831-1,384)   |
|                  | Unclassifiable by site, Total | Injury patients, n                             | 888               | 5,137                 | 3,303           |                       |
|                  |                               | With >0 absences, n patients                   | 677               | 715                   | 158             |                       |
|                  |                               | No. absences (patients with >0), mean n days   | 39.72             | 47.83                 | 49.48           |                       |
|                  |                               | No. absences (all patients), mean n days       | 30.28             | 6.66                  | 2.37            |                       |
|                  |                               | Control enrollees, n                           | 3,951             | 25,026                | 15,809          |                       |
|                  |                               | With >0 absences, n enrollees                  | 2,956             | 1,568                 | 399             |                       |
|                  |                               | No. absences (enrollees with >0), mean n days  | 33.85             | 42.90                 | 51.41           |                       |
|                  |                               | No. absences (all enrollees), mean n days      | 25.33             | 2.69                  | 1.30            |                       |
|                  |                               | Estimated attributable absences and cost       |                   |                       |                 |                       |
|                  |                               | Absent days, simple mean                       | 4.95              | 3.97                  | 1.07            | 10.0                  |
|                  |                               | Absent days, regression-adjusted mean (95% CI) | 3.9 (2.0-5.8)     | 4.1 (3.2-4.9)         | 1.4 (0.5-2.3)   | 9.4 (7.8-11.1)        |
|                  |                               | Estimated cost, mean (95% CI)                  | \$551 (284-817)   | \$571 (451-690)       | \$202 (76-329)  | \$1,324 (1,090-1,567) |
| All body regions | All body regions              | Injury patients, n                             | 11,282            | 67,821                | 43,109          |                       |
|                  |                               | With >0 absences, n patients                   | 8,493             | 11,092                | 1,704           |                       |
|                  |                               | No. absences (patients with >0), mean n days   | 38.64             | 49.96                 | 54.54           |                       |
|                  |                               | No. absences (all patients), mean n days       | 29.09             | 8.17                  | 2.16            |                       |

|  |                                                |                 |                 |                 |                       |
|--|------------------------------------------------|-----------------|-----------------|-----------------|-----------------------|
|  | Control enrollees, n                           | 50,409          | 330,167         | 206,201         |                       |
|  | With >0 absences, n enrollees                  | 37,576          | 20,018          | 4,633           |                       |
|  | No. absences (enrollees with >0), mean n days  | 32.73           | 41.32           | 46.78           |                       |
|  | No. absences (all enrollees), mean n days      | 24.40           | 2.51            | 1.05            |                       |
|  | Estimated attributable absences and cost       |                 |                 |                 |                       |
|  | Absent days, simple mean                       | 4.69            | 5.66            | 1.11            | 11.5                  |
|  | Absent days, regression-adjusted mean (95% CI) | 3.6 (3.1-4.1)   | 6.6 (6.3-6.9)   | 1.1 (0.9-1.3)   | 11.3 (10.8-11.7)      |
|  | Estimated cost, mean (95% CI)                  | \$506 (430-582) | \$927 (887-966) | \$155 (128-180) | \$1,587 (1,520-1,650) |

Notes. All costs are 2015 USD. NC = not calculated, due to low number of observations (<50 injury or control enrollees with >0 absences) in the data source. NS = not significant, the regression-adjusted attributable number of lost work days due to the injury type was not statistically significantly higher among injured patients compared to control enrollees.

Values are mean (95% confidence interval [CI] or prediction interval [PI])—in the case that multiple estimates by absence type were probabilistically combined using @RISK. For injury types with just one attributable absence type value reported, "Total" days reflects that absence type's mean (95% CI) regression-adjusted value. Otherwise, variance for "Total" days estimates was based on a probabilistic combination of variance for multiple absence type estimates (e.g., workplace absence + short-term disability absence estimates for Traumatic brain injuries) using Excel Palisade @RISK (Ithaca, NY). For those calculations, 1,000 sums drawn from Pert distributions representing each absence type—with mean (95% CI) estimates of absent days by type included as the distributions' most likely, minimum, and maximum values—were computed, and the middle 95% of resulting values comprise the reported PI range. Total cost was assessed as the mean number of days and 95% CI or PI values multiplied by the estimated value of lost work days described in the Methods text (\$141).

Source data: MarketScan Health and Productivity Management dataset, 2014-2016. Injury classification is based on the ICD-9-CM Barrell Matrix ([www.cdc.gov/nchs/injury/injury\\_tools.htm](http://www.cdc.gov/nchs/injury/injury_tools.htm)).

**STable 3. Number of injury and control enrollees and estimated average per-person one-year number and associated value of lost work days due to non-fatal injuries (by mechanism) initially treated in an emergency department during October 1, 2014 through September 30, 2015, Marketscan – Employer health insurance enrollees age 18-64 years, ED disposition: Hospitalized (2015 USD)**

| Mechanism                                      | Measure                                       | Work absence          | Short-term disability | Workers' compensation | Total days and cost |
|------------------------------------------------|-----------------------------------------------|-----------------------|-----------------------|-----------------------|---------------------|
| Cut/pierce                                     | Injury patients, n                            | 1                     | 7                     | 3                     |                     |
|                                                | With >0 absences, n patients                  | 1                     | 2                     | 0                     |                     |
|                                                | No. absences (patients with >0), mean n days  | 49.38                 | 112.14                | 0.00                  |                     |
|                                                | No. absences (all patients), mean n days      | 49.38                 | 32.04                 | 0.00                  |                     |
|                                                | Control enrollees, n                          | 5                     | 35                    | 15                    |                     |
|                                                | With >0 absences, n enrollees                 | 5                     | 4                     | 1                     |                     |
|                                                | No. absences (enrollees with >0), mean n days | 49.82                 | 16.61                 | 55.71                 |                     |
|                                                | No. absences (all enrollees), mean n days     | 49.82                 | 1.90                  | 3.71                  |                     |
|                                                | Estimated attributable absences and cost      |                       |                       |                       |                     |
|                                                | Absent days, simple mean                      | NC                    | NC                    | NC                    | NC                  |
| Absent days, regression-adjusted mean (95% CI) | NC                                            | NC                    | NC                    | NC                    |                     |
| Estimated cost, mean (95% CI)                  | NC                                            | NC                    | NC                    | NC                    |                     |
| Drowning/submersion                            | Injury patients, n                            | 0                     | 1                     | 0                     |                     |
|                                                | With >0 absences, n patients                  | 0                     | 1                     | 0                     |                     |
|                                                | No. absences (patients with >0), mean n days  | 0.00                  | 30.00                 | 0.00                  |                     |
|                                                | No. absences (all patients), mean n days      | 0.00                  | 30.00                 | 0.00                  |                     |
|                                                | Control enrollees, n                          | 0                     | 5                     | 0                     |                     |
|                                                | With >0 absences, n enrollees                 | 0                     | 0                     | 0                     |                     |
|                                                | No. absences (enrollees with >0), mean n days | 0.00                  | 0.00                  | 0.00                  |                     |
|                                                | No. absences (all enrollees), mean n days     | 0.00                  | 0.00                  | 0.00                  |                     |
|                                                | Estimated attributable absences and cost      |                       |                       |                       |                     |
|                                                | Absent days, simple mean                      | NC                    | NC                    | NC                    | NC                  |
| Absent days, regression-adjusted mean (95% CI) | NC                                            | NC                    | NC                    | NC                    |                     |
| Estimated cost, mean (95% CI)                  | NC                                            | NC                    | NC                    | NC                    |                     |
| Fall                                           | Injury patients, n                            | 63                    | 299                   | 191                   |                     |
|                                                | With >0 absences, n patients                  | 46                    | 137                   | 5                     |                     |
|                                                | No. absences (patients with >0), mean n days  | 57.15                 | 72.30                 | 113.00                |                     |
|                                                | No. absences (all patients), mean n days      | 41.73                 | 33.13                 | 2.96                  |                     |
|                                                | Control enrollees, n                          | 275                   | 1,469                 | 916                   |                     |
|                                                | With >0 absences, n enrollees                 | 214                   | 113                   | 17                    |                     |
|                                                | No. absences (enrollees with >0), mean n days | 34.29                 | 41.25                 | 52.77                 |                     |
|                                                | No. absences (all enrollees), mean n days     | 26.68                 | 3.17                  | 0.98                  |                     |
|                                                | Estimated attributable absences and cost      |                       |                       |                       |                     |
|                                                | Absent days, simple mean                      | NC                    | 29.96                 | NC                    | 30.0                |
| Absent days, regression-adjusted mean (95% CI) | NC                                            | 49.5 (29.7-69.2)      | NC                    | 49.5 (29.7-69.2)      |                     |
| Estimated cost, mean (95% CI)                  | NC                                            | \$6,956 (4,182-9,728) | NC                    | \$6,956 (4,182-9,728) |                     |
| Fire/burn                                      | Injury patients, n                            | 3                     | 17                    | 14                    |                     |
|                                                | With >0 absences, n patients                  | 2                     | 11                    | 1                     |                     |
|                                                | No. absences (patients with >0), mean n days  | 102.12                | 57.27                 | 30.00                 |                     |
|                                                | No. absences (all patients), mean n days      | 68.08                 | 37.06                 | 2.14                  |                     |
|                                                | Control enrollees, n                          | 11                    | 81                    | 65                    |                     |
|                                                | With >0 absences, n enrollees                 | 10                    | 3                     | 0                     |                     |
|                                                | No. absences (enrollees with >0), mean n days | 37.55                 | 50.71                 | 0.00                  |                     |
|                                                | No. absences (all enrollees), mean n days     | 34.13                 | 1.88                  | 0.00                  |                     |
|                                                | Estimated attributable absences and cost      |                       |                       |                       |                     |
|                                                | Absent days, simple mean                      | NC                    | NC                    | NC                    | NC                  |

|                                                |                                                |        |        |       |    |
|------------------------------------------------|------------------------------------------------|--------|--------|-------|----|
|                                                | Absent days, regression-adjusted mean (95% CI) | NC     | NC     | NC    | NC |
|                                                | Estimated cost, mean (95% CI)                  | NC     | NC     | NC    | NC |
| Fire/flame                                     | Injury patients, n                             | 3      | 9      | 8     |    |
|                                                | With >0 absences, n patients                   | 2      | 7      | 0     |    |
|                                                | No. absences (patients with >0), mean n days   | 102.12 | 79.39  | 0.00  |    |
|                                                | No. absences (all patients), mean n days       | 68.08  | 61.75  | 0.00  |    |
|                                                | Control enrollees, n                           | 11     | 43     | 35    |    |
|                                                | With >0 absences, n enrollees                  | 10     | 2      | 0     |    |
|                                                | No. absences (enrollees with >0), mean n days  | 37.55  | 13.93  | 0.00  |    |
|                                                | No. absences (all enrollees), mean n days      | 34.13  | 0.65   | 0.00  |    |
|                                                | Estimated attributable absences and cost       |        |        |       |    |
|                                                | Absent days, simple mean                       | NC     | NC     | NC    | NC |
| Absent days, regression-adjusted mean (95% CI) | NC                                             | NC     | NC     | NC    |    |
| Estimated cost, mean (95% CI)                  | NC                                             | NC     | NC     | NC    |    |
| Hot object/substance                           | Injury patients, n                             | 0      | 8      | 6     |    |
|                                                | With >0 absences, n patients                   | 0      | 4      | 1     |    |
|                                                | No. absences (patients with >0), mean n days   | 0.00   | 18.57  | 30.00 |    |
|                                                | No. absences (all patients), mean n days       | 0.00   | 9.29   | 5.00  |    |
|                                                | Control enrollees, n                           | 0      | 38     | 30    |    |
|                                                | With >0 absences, n enrollees                  | 0      | 1      | 0     |    |
|                                                | No. absences (enrollees with >0), mean n days  | 0.00   | 124.29 | 0.00  |    |
|                                                | No. absences (all enrollees), mean n days      | 0.00   | 3.27   | 0.00  |    |
|                                                | Estimated attributable absences and cost       |        |        |       |    |
|                                                | Absent days, simple mean                       | NC     | NC     | NC    | NC |
| Absent days, regression-adjusted mean (95% CI) | NC                                             | NC     | NC     | NC    |    |
| Estimated cost, mean (95% CI)                  | NC                                             | NC     | NC     | NC    |    |
| Firearm                                        | Injury patients, n                             | 2      | 9      | 3     |    |
|                                                | With >0 absences, n patients                   | 2      | 6      | 1     |    |
|                                                | No. absences (patients with >0), mean n days   | 72.92  | 54.52  | 1.43  |    |
|                                                | No. absences (all patients), mean n days       | 72.92  | 36.35  | 0.48  |    |
|                                                | Control enrollees, n                           | 10     | 37     | 15    |    |
|                                                | With >0 absences, n enrollees                  | 9      | 2      | 1     |    |
|                                                | No. absences (enrollees with >0), mean n days  | 46.10  | 25.71  | 32.14 |    |
|                                                | No. absences (all enrollees), mean n days      | 41.49  | 1.39   | 2.14  |    |
|                                                | Estimated attributable absences and cost       |        |        |       |    |
|                                                | Absent days, simple mean                       | NC     | NC     | NC    | NC |
| Absent days, regression-adjusted mean (95% CI) | NC                                             | NC     | NC     | NC    |    |
| Estimated cost, mean (95% CI)                  | NC                                             | NC     | NC     | NC    |    |
| Machinery                                      | Injury patients, n                             | 1      | 5      | 4     |    |
|                                                | With >0 absences, n patients                   | 1      | 4      | 0     |    |
|                                                | No. absences (patients with >0), mean n days   | 36.00  | 53.04  | 0.00  |    |
|                                                | No. absences (all patients), mean n days       | 36.00  | 42.43  | 0.00  |    |
|                                                | Control enrollees, n                           | 5      | 23     | 20    |    |
|                                                | With >0 absences, n enrollees                  | 5      | 2      | 1     |    |
|                                                | No. absences (enrollees with >0), mean n days  | 37.34  | 48.57  | 40.00 |    |
|                                                | No. absences (all enrollees), mean n days      | 37.34  | 4.22   | 2.00  |    |
|                                                | Estimated attributable absences and cost       |        |        |       |    |
|                                                | Absent days, simple mean                       | NC     | NC     | NC    | NC |
| Absent days, regression-adjusted mean (95% CI) | NC                                             | NC     | NC     | NC    |    |
| Estimated cost, mean (95% CI)                  | NC                                             | NC     | NC     | NC    |    |
| Motor vehicle traffic                          | Injury patients, n                             | 73     | 290    | 200   |    |
|                                                | With >0 absences, n patients                   | 60     | 163    | 3     |    |
|                                                | No. absences (patients with >0), mean n days   | 77.39  | 80.20  | 1.43  |    |

|               |                                                |                       |                         |        |                          |
|---------------|------------------------------------------------|-----------------------|-------------------------|--------|--------------------------|
|               | No. absences (all patients), mean n days       | 63.61                 | 45.08                   | 0.02   |                          |
|               | Control enrollees, n                           | 321                   | 1,397                   | 949    |                          |
|               | With >0 absences, n enrollees                  | 260                   | 77                      | 27     |                          |
|               | No. absences (enrollees with >0), mean n days  | 35.66                 | 36.05                   | 46.83  |                          |
|               | No. absences (all enrollees), mean n days      | 28.89                 | 1.99                    | 1.33   |                          |
|               | Estimated attributable absences and cost       |                       |                         |        |                          |
|               | Absent days, simple mean                       | 34.72                 | 43.09                   | NC     | 77.8                     |
|               | Absent days, regression-adjusted mean (95% CI) | 28.2 (16.0-40.5)      | 131.1 (61.3-200.9)      | NC     | 159.3 (108.6-209.8)      |
|               | Estimated cost, mean (95% CI)                  | \$3,969 (2,251-5,687) | \$18,433 (8,620-28,247) | NC     | \$22,403 (15,272-29,498) |
| Occupant      | Injury patients, n                             | 18                    | 109                     | 66     |                          |
|               | With >0 absences, n patients                   | 16                    | 60                      | 2      |                          |
|               | No. absences (patients with >0), mean n days   | 83.15                 | 85.54                   | 1.43   |                          |
|               | No. absences (all patients), mean n days       | 73.91                 | 47.08                   | 0.04   |                          |
|               | Control enrollees, n                           | 76                    | 520                     | 317    |                          |
|               | With >0 absences, n enrollees                  | 60                    | 31                      | 7      |                          |
|               | No. absences (enrollees with >0), mean n days  | 36.28                 | 41.27                   | 56.53  |                          |
|               | No. absences (all enrollees), mean n days      | 28.64                 | 2.46                    | 1.25   |                          |
|               | Estimated attributable absences and cost       |                       |                         |        |                          |
|               | Absent days, simple mean                       | NC                    | NC                      | NC     | NC                       |
|               | Absent days, regression-adjusted mean (95% CI) | NC                    | NC                      | NC     | NC                       |
|               | Estimated cost, mean (95% CI)                  | NC                    | NC                      | NC     | NC                       |
| Motorcyclist  | Injury patients, n                             | 34                    | 97                      | 76     |                          |
|               | With >0 absences, n patients                   | 26                    | 56                      | 0      |                          |
|               | No. absences (patients with >0), mean n days   | 78.20                 | 83.09                   | 0.00   |                          |
|               | No. absences (all patients), mean n days       | 59.80                 | 47.97                   | 0.00   |                          |
|               | Control enrollees, n                           | 142                   | 468                     | 355    |                          |
|               | With >0 absences, n enrollees                  | 120                   | 24                      | 12     |                          |
|               | No. absences (enrollees with >0), mean n days  | 36.30                 | 31.55                   | 36.55  |                          |
|               | No. absences (all enrollees), mean n days      | 30.67                 | 1.62                    | 1.24   |                          |
|               | Estimated attributable absences and cost       |                       |                         |        |                          |
|               | Absent days, simple mean                       | NC                    | NC                      | NC     | NC                       |
|               | Absent days, regression-adjusted mean (95% CI) | NC                    | NC                      | NC     | NC                       |
|               | Estimated cost, mean (95% CI)                  | NC                    | NC                      | NC     | NC                       |
| Pedal cyclist | Injury patients, n                             | 2                     | 3                       | 3      |                          |
|               | With >0 absences, n patients                   | 2                     | 2                       | 0      |                          |
|               | No. absences (patients with >0), mean n days   | 56.63                 | 15.00                   | 0.00   |                          |
|               | No. absences (all patients), mean n days       | 56.63                 | 10.00                   | 0.00   |                          |
|               | Control enrollees, n                           | 10                    | 15                      | 15     |                          |
|               | With >0 absences, n enrollees                  | 10                    | 0                       | 0      |                          |
|               | No. absences (enrollees with >0), mean n days  | 36.10                 | 0.00                    | 0.00   |                          |
|               | No. absences (all enrollees), mean n days      | 36.10                 | 0.00                    | 0.00   |                          |
|               | Estimated attributable absences and cost       |                       |                         |        |                          |
|               | Absent days, simple mean                       | NC                    | NC                      | NC     | NC                       |
|               | Absent days, regression-adjusted mean (95% CI) | NC                    | NC                      | NC     | NC                       |
|               | Estimated cost, mean (95% CI)                  | NC                    | NC                      | NC     | NC                       |
| Pedestrian    | Injury patients, n                             | 1                     | 9                       | 5      |                          |
|               | With >0 absences, n patients                   | 1                     | 7                       | 0      |                          |
|               | No. absences (patients with >0), mean n days   | 76.38                 | 74.29                   | 0.00   |                          |
|               | No. absences (all patients), mean n days       | 76.38                 | 57.78                   | 0.00   |                          |
|               | Control enrollees, n                           | 5                     | 45                      | 25     |                          |
|               | With >0 absences, n enrollees                  | 4                     | 3                       | 1      |                          |
|               | No. absences (enrollees with >0), mean n days  | 23.88                 | 29.29                   | 138.57 |                          |
|               | No. absences (all enrollees), mean n days      | 19.10                 | 1.95                    | 5.54   |                          |

|                       |                                                |       |       |       |    |
|-----------------------|------------------------------------------------|-------|-------|-------|----|
|                       | Estimated attributable absences and cost       |       |       |       |    |
|                       | Absent days, simple mean                       | NC    | NC    | NC    | NC |
|                       | Absent days, regression-adjusted mean (95% CI) | NC    | NC    | NC    | NC |
|                       | Estimated cost, mean (95% CI)                  | NC    | NC    | NC    | NC |
| Unspecified MV        | Injury patients, n                             | 17    | 67    | 47    |    |
|                       | With >0 absences, n patients                   | 14    | 35    | 0     |    |
|                       | No. absences (patients with >0), mean n days   | 72.67 | 74.35 | 0.00  |    |
|                       | No. absences (all patients), mean n days       | 59.85 | 38.84 | 0.00  |    |
|                       | Control enrollees, n                           | 83    | 324   | 222   |    |
|                       | With >0 absences, n enrollees                  | 61    | 19    | 7     |    |
|                       | No. absences (enrollees with >0), mean n days  | 32.71 | 34.29 | 41.63 |    |
|                       | No. absences (all enrollees), mean n days      | 24.04 | 2.01  | 1.31  |    |
|                       | Estimated attributable absences and cost       |       |       |       |    |
|                       | Absent days, simple mean                       | NC    | NC    | NC    | NC |
|                       | Absent days, regression-adjusted mean (95% CI) | NC    | NC    | NC    | NC |
|                       | Estimated cost, mean (95% CI)                  | NC    | NC    | NC    | NC |
| Other pedal cyclist   | Injury patients, n                             | 9     | 42    | 21    |    |
|                       | With >0 absences, n patients                   | 7     | 14    | 0     |    |
|                       | No. absences (patients with >0), mean n days   | 32.65 | 47.76 | 0.00  |    |
|                       | No. absences (all patients), mean n days       | 25.39 | 15.92 | 0.00  |    |
|                       | Control enrollees, n                           | 33    | 208   | 98    |    |
|                       | With >0 absences, n enrollees                  | 26    | 14    | 4     |    |
|                       | No. absences (enrollees with >0), mean n days  | 32.83 | 32.91 | 98.75 |    |
|                       | No. absences (all enrollees), mean n days      | 25.87 | 2.21  | 4.03  |    |
|                       | Estimated attributable absences and cost       |       |       |       |    |
|                       | Absent days, simple mean                       | NC    | NC    | NC    | NC |
|                       | Absent days, regression-adjusted mean (95% CI) | NC    | NC    | NC    | NC |
|                       | Estimated cost, mean (95% CI)                  | NC    | NC    | NC    | NC |
| Other pedestrian      | Injury patients, n                             | 1     | 1     | 1     |    |
|                       | With >0 absences, n patients                   | 1     | 1     | 0     |    |
|                       | No. absences (patients with >0), mean n days   | 21.50 | 40.00 | 0.00  |    |
|                       | No. absences (all patients), mean n days       | 21.50 | 40.00 | 0.00  |    |
|                       | Control enrollees, n                           | 5     | 5     | 5     |    |
|                       | With >0 absences, n enrollees                  | 4     | 0     | 0     |    |
|                       | No. absences (enrollees with >0), mean n days  | 35.69 | 0.00  | 0.00  |    |
|                       | No. absences (all enrollees), mean n days      | 28.55 | 0.00  | 0.00  |    |
|                       | Estimated attributable absences and cost       |       |       |       |    |
|                       | Absent days, simple mean                       | NC    | NC    | NC    | NC |
|                       | Absent days, regression-adjusted mean (95% CI) | NC    | NC    | NC    | NC |
|                       | Estimated cost, mean (95% CI)                  | NC    | NC    | NC    | NC |
| Other transport       | Injury patients, n                             | 13    | 48    | 42    |    |
|                       | With >0 absences, n patients                   | 9     | 18    | 1     |    |
|                       | No. absences (patients with >0), mean n days   | 72.89 | 74.44 | 24.29 |    |
|                       | No. absences (all patients), mean n days       | 50.46 | 27.92 | 0.58  |    |
|                       | Control enrollees, n                           | 62    | 240   | 210   |    |
|                       | With >0 absences, n enrollees                  | 49    | 8     | 5     |    |
|                       | No. absences (enrollees with >0), mean n days  | 34.54 | 52.86 | 58.00 |    |
|                       | No. absences (all enrollees), mean n days      | 27.30 | 1.76  | 1.38  |    |
|                       | Estimated attributable absences and cost       |       |       |       |    |
|                       | Absent days, simple mean                       | NC    | NC    | NC    | NC |
|                       | Absent days, regression-adjusted mean (95% CI) | NC    | NC    | NC    | NC |
|                       | Estimated cost, mean (95% CI)                  | NC    | NC    | NC    | NC |
| Natural/environmental | Injury patients, n                             | 0     | 4     | 2     |    |



|                   |                                                |       |       |       |    |
|-------------------|------------------------------------------------|-------|-------|-------|----|
|                   | With >0 absences, n patients                   | 0     | 3     | 0     |    |
|                   | No. absences (patients with >0), mean n days   | 0.00  | 31.90 | 0.00  |    |
|                   | No. absences (all patients), mean n days       | 0.00  | 23.93 | 0.00  |    |
|                   | Control enrollees, n                           | 0     | 20    | 10    |    |
|                   | With >0 absences, n enrollees                  | 0     | 1     | 0     |    |
|                   | No. absences (enrollees with >0), mean n days  | 0.00  | 1.43  | 0.00  |    |
|                   | No. absences (all enrollees), mean n days      | 0.00  | 0.07  | 0.00  |    |
|                   | Estimated attributable absences and cost       |       |       |       |    |
|                   | Absent days, simple mean                       | NC    | NC    | NC    | NC |
|                   | Absent days, regression-adjusted mean (95% CI) | NC    | NC    | NC    | NC |
|                   | Estimated cost, mean (95% CI)                  | NC    | NC    | NC    | NC |
| Bites and stings  | Injury patients, n                             | 5     | 22    | 11    |    |
|                   | With >0 absences, n patients                   | 4     | 3     | 2     |    |
|                   | No. absences (patients with >0), mean n days   | 96.44 | 50.24 | 27.14 |    |
|                   | No. absences (all patients), mean n days       | 77.15 | 6.85  | 4.94  |    |
|                   | Control enrollees, n                           | 18    | 110   | 53    |    |
|                   | With >0 absences, n enrollees                  | 13    | 9     | 0     |    |
|                   | No. absences (enrollees with >0), mean n days  | 30.69 | 28.25 | 0.00  |    |
|                   | No. absences (all enrollees), mean n days      | 22.17 | 2.31  | 0.00  |    |
|                   | Estimated attributable absences and cost       |       |       |       |    |
|                   | Absent days, simple mean                       | NC    | NC    | NC    | NC |
|                   | Absent days, regression-adjusted mean (95% CI) | NC    | NC    | NC    | NC |
|                   | Estimated cost, mean (95% CI)                  | NC    | NC    | NC    | NC |
| Overexertion      | Injury patients, n                             | 2     | 13    | 6     |    |
|                   | With >0 absences, n patients                   | 2     | 5     | 0     |    |
|                   | No. absences (patients with >0), mean n days   | 35.22 | 60.00 | 0.00  |    |
|                   | No. absences (all patients), mean n days       | 35.22 | 23.08 | 0.00  |    |
|                   | Control enrollees, n                           | 9     | 63    | 30    |    |
|                   | With >0 absences, n enrollees                  | 9     | 1     | 0     |    |
|                   | No. absences (enrollees with >0), mean n days  | 27.56 | 50.71 | 0.00  |    |
|                   | No. absences (all enrollees), mean n days      | 27.56 | 0.80  | 0.00  |    |
|                   | Estimated attributable absences and cost       |       |       |       |    |
|                   | Absent days, simple mean                       | NC    | NC    | NC    | NC |
|                   | Absent days, regression-adjusted mean (95% CI) | NC    | NC    | NC    | NC |
|                   | Estimated cost, mean (95% CI)                  | NC    | NC    | NC    | NC |
| Poisoning         | Injury patients, n                             | 18    | 98    | 56    |    |
|                   | With >0 absences, n patients                   | 12    | 37    | 3     |    |
|                   | No. absences (patients with >0), mean n days   | 89.76 | 48.17 | 46.90 |    |
|                   | No. absences (all patients), mean n days       | 59.84 | 18.19 | 2.51  |    |
|                   | Control enrollees, n                           | 77    | 472   | 264   |    |
|                   | With >0 absences, n enrollees                  | 61    | 48    | 10    |    |
|                   | No. absences (enrollees with >0), mean n days  | 46.23 | 44.24 | 56.00 |    |
|                   | No. absences (all enrollees), mean n days      | 36.62 | 4.50  | 2.12  |    |
|                   | Estimated attributable absences and cost       |       |       |       |    |
|                   | Absent days, simple mean                       | NC    | NC    | NC    | NC |
|                   | Absent days, regression-adjusted mean (95% CI) | NC    | NC    | NC    | NC |
|                   | Estimated cost, mean (95% CI)                  | NC    | NC    | NC    | NC |
| Struck by/against | Injury patients, n                             | 7     | 18    | 13    |    |
|                   | With >0 absences, n patients                   | 6     | 7     | 0     |    |
|                   | No. absences (patients with >0), mean n days   | 39.16 | 94.49 | 0.00  |    |
|                   | No. absences (all patients), mean n days       | 33.56 | 36.75 | 0.00  |    |
|                   | Control enrollees, n                           | 32    | 88    | 61    |    |
|                   | With >0 absences, n enrollees                  | 26    | 3     | 0     |    |

|                               |                                                |       |       |       |    |
|-------------------------------|------------------------------------------------|-------|-------|-------|----|
|                               | No. absences (enrollees with >0), mean n days  | 31.77 | 68.57 | 0.00  |    |
|                               | No. absences (all enrollees), mean n days      | 25.81 | 2.34  | 0.00  |    |
|                               | Estimated attributable absences and cost       |       |       |       |    |
|                               | Absent days, simple mean                       | NC    | NC    | NC    | NC |
|                               | Absent days, regression-adjusted mean (95% CI) | NC    | NC    | NC    | NC |
|                               | Estimated cost, mean (95% CI)                  | NC    | NC    | NC    | NC |
| Suffocation                   | Injury patients, n                             | 2     | 3     | 1     |    |
|                               | With >0 absences, n patients                   | 1     | 0     | 0     |    |
|                               | No. absences (patients with >0), mean n days   | 21.13 | 0.00  | 0.00  |    |
|                               | No. absences (all patients), mean n days       | 10.56 | 0.00  | 0.00  |    |
|                               | Control enrollees, n                           | 7     | 15    | 5     |    |
|                               | With >0 absences, n enrollees                  | 6     | 1     | 2     |    |
|                               | No. absences (enrollees with >0), mean n days  | 35.02 | 37.14 | 20.36 |    |
|                               | No. absences (all enrollees), mean n days      | 30.01 | 2.48  | 8.14  |    |
|                               | Estimated attributable absences and cost       |       |       |       |    |
|                               | Absent days, simple mean                       | NC    | NC    | NC    | NC |
|                               | Absent days, regression-adjusted mean (95% CI) | NC    | NC    | NC    | NC |
|                               | Estimated cost, mean (95% CI)                  | NC    | NC    | NC    | NC |
| Other specified, calssifiable | Injury patients, n                             | 5     | 19    | 12    |    |
|                               | With >0 absences, n patients                   | 4     | 6     | 1     |    |
|                               | No. absences (patients with >0), mean n days   | 38.02 | 38.69 | 85.00 |    |
|                               | No. absences (all patients), mean n days       | 30.41 | 12.22 | 7.08  |    |
|                               | Control enrollees, n                           | 25    | 93    | 60    |    |
|                               | With >0 absences, n enrollees                  | 19    | 4     | 1     |    |
|                               | No. absences (enrollees with >0), mean n days  | 34.28 | 50.36 | 14.29 |    |
|                               | No. absences (all enrollees), mean n days      | 26.06 | 2.17  | 0.24  |    |
|                               | Estimated attributable absences and cost       |       |       |       |    |
|                               | Absent days, simple mean                       | NC    | NC    | NC    | NC |
|                               | Absent days, regression-adjusted mean (95% CI) | NC    | NC    | NC    | NC |
|                               | Estimated cost, mean (95% CI)                  | NC    | NC    | NC    | NC |
| Other specified, NEC          | Injury patients, n                             | 1     | 12    | 9     |    |
|                               | With >0 absences, n patients                   | 0     | 2     | 0     |    |
|                               | No. absences (patients with >0), mean n days   | 0.00  | 64.64 | 0.00  |    |
|                               | No. absences (all patients), mean n days       | 0.00  | 10.77 | 0.00  |    |
|                               | Control enrollees, n                           | 5     | 59    | 42    |    |
|                               | With >0 absences, n enrollees                  | 4     | 5     | 2     |    |
|                               | No. absences (enrollees with >0), mean n days  | 29.54 | 17.86 | 35.36 |    |
|                               | No. absences (all enrollees), mean n days      | 23.64 | 1.51  | 1.68  |    |
|                               | Estimated attributable absences and cost       |       |       |       |    |
|                               | Absent days, simple mean                       | NC    | NC    | NC    | NC |
|                               | Absent days, regression-adjusted mean (95% CI) | NC    | NC    | NC    | NC |
|                               | Estimated cost, mean (95% CI)                  | NC    | NC    | NC    | NC |
| Unspecified                   | Injury patients, n                             | 10    | 42    | 39    |    |
|                               | With >0 absences, n patients                   | 7     | 22    | 1     |    |
|                               | No. absences (patients with >0), mean n days   | 64.17 | 59.16 | 1.43  |    |
|                               | No. absences (all patients), mean n days       | 44.92 | 30.99 | 0.04  |    |
|                               | Control enrollees, n                           | 42    | 197   | 180   |    |
|                               | With >0 absences, n enrollees                  | 34    | 19    | 5     |    |
|                               | No. absences (enrollees with >0), mean n days  | 37.32 | 53.87 | 16.14 |    |
|                               | No. absences (all enrollees), mean n days      | 30.21 | 5.20  | 0.45  |    |
|                               | Estimated attributable absences and cost       |       |       |       |    |
|                               | Absent days, simple mean                       | NC    | NC    | NC    | NC |
|                               | Absent days, regression-adjusted mean (95% CI) | NC    | NC    | NC    | NC |

|                                                | Estimated cost, mean (95% CI)                 | NC                    | NC    | NC                    | NC   |
|------------------------------------------------|-----------------------------------------------|-----------------------|-------|-----------------------|------|
| Adverse effects                                | Injury patients, n                            | 0                     | 2     | 1                     |      |
|                                                | With >0 absences, n patients                  | 0                     | 1     | 0                     |      |
|                                                | No. absences (patients with >0), mean n days  | 0.00                  | 68.57 | 0.00                  |      |
|                                                | No. absences (all patients), mean n days      | 0.00                  | 34.29 | 0.00                  |      |
|                                                | Control enrollees, n                          | 0                     | 10    | 5                     |      |
|                                                | With >0 absences, n enrollees                 | 0                     | 1     | 0                     |      |
|                                                | No. absences (enrollees with >0), mean n days | 0.00                  | 40.71 | 0.00                  |      |
|                                                | No. absences (all enrollees), mean n days     | 0.00                  | 4.07  | 0.00                  |      |
|                                                | Estimated attributable absences and cost      |                       |       |                       |      |
|                                                | Absent days, simple mean                      | NC                    | NC    | NC                    | NC   |
| Absent days, regression-adjusted mean (95% CI) | NC                                            | NC                    | NC    | NC                    |      |
| Estimated cost, mean (95% CI)                  | NC                                            | NC                    | NC    | NC                    |      |
| Ecode Missing                                  | Injury patients, n                            | 172                   | 1,031 | 605                   |      |
|                                                | With >0 absences, n patients                  | 135                   | 435   | 16                    |      |
|                                                | No. absences (patients with >0), mean n days  | 53.51                 | 69.98 | 33.30                 |      |
|                                                | No. absences (all patients), mean n days      | 42.00                 | 29.53 | 0.88                  |      |
|                                                | Control enrollees, n                          | 747                   | 5,011 | 2,885                 |      |
|                                                | With >0 absences, n enrollees                 | 568                   | 299   | 73                    |      |
|                                                | No. absences (enrollees with >0), mean n days | 33.71                 | 42.60 | 48.76                 |      |
|                                                | No. absences (all enrollees), mean n days     | 25.63                 | 2.54  | 1.23                  |      |
|                                                | Estimated attributable absences and cost      |                       |       |                       |      |
|                                                | Absent days, simple mean                      | 16.37                 | 26.99 | NC                    | 43.4 |
| Absent days, regression-adjusted mean (95% CI) | 13.8 (8.1-19.5)                               | 39.3 (30.7-47.8)      | NC    | 53.0 (45.9-60.1)      |      |
| Estimated cost, mean (95% CI)                  | \$1,938 (1,136-2,738)                         | \$5,519 (4,322-6,715) | NC    | \$7,456 (6,450-8,444) |      |
| Total                                          | Injury patients, n                            | 388                   | 1,983 | 1,234                 |      |
|                                                | With >0 absences, n patients                  | 300                   | 878   | 34                    |      |
|                                                | No. absences (patients with >0), mean n days  | 60.76                 | 70.17 | 42.33                 |      |
|                                                | No. absences (all patients), mean n days      | 46.98                 | 31.07 | 1.17                  |      |
|                                                | Control enrollees, n                          | 1,689                 | 9,638 | 5,888                 |      |
|                                                | With >0 absences, n enrollees                 | 1,322                 | 614   | 149                   |      |
|                                                | No. absences (enrollees with >0), mean n days | 34.96                 | 41.45 | 48.99                 |      |
|                                                | No. absences (all enrollees), mean n days     | 27.36                 | 2.64  | 1.24                  |      |
|                                                | Estimated attributable absences and cost      |                       |       |                       |      |
|                                                | Absent days, simple mean                      | 19.62                 | 28.43 | NC                    | 48.1 |
| Absent days, regression-adjusted mean (95% CI) | 16.1 (11.6-20.5)                              | 44.5 (37.3-51.6)      | NC    | 60.5 (54.6-66.7)      |      |
| Estimated cost, mean (95% CI)                  | \$2,257 (1,630-2,884)                         | \$6,254 (5,249-7,259) | NC    | \$8,511 (7,681-9,372) |      |

Notes. All costs are 2015 USD. NC = not calculated, due to low number of observations (<50 injury or control enrollees with >0 absences) in the data source. NEC = Not elsewhere classifiable. NS = not significant, the regression-adjusted attributable number of lost work days due to the injury type was not statistically significantly higher among injured patients compared to control enrollees.

Values are mean (95% confidence interval [CI] or prediction interval [PI])—in the case that multiple estimates by absence type were probabilistically combined). For injury types with just one attributable absence type value reported, "Total" days reflects that absence type's mean (95% CI) regression-adjusted value. Otherwise, variance for "Total" days estimates was based on a probabilistic combination of variance for multiple absence type estimates (e.g., workplace absence + short-term disability absence estimates for Cut/pierce injuries) using Excel Palisade @RISK (Ithaca, NY). For those calculations, 1,000 sums drawn from Pert distributions representing each absence type—with mean (95% CI) estimates of absent days by type included as the distributions' most likely, minimum, and maximum values—were computed, and the middle 95% of resulting values comprise the reported PI range. Total cost was assessed as the mean number of days and 95% CI or PI values multiplied by the estimated value of lost work days described in the Methods text (\$141).

Source data: MarketScan Health and Productivity Management dataset, 2014-2016. Injury classification is based on the ICD-9-CM E-code Matrix ([www.cdc.gov/nchs/injury/injury\\_tools.htm](http://www.cdc.gov/nchs/injury/injury_tools.htm)).

**STable 4. Number of injury and control enrollees and estimated average per-person one-year number and associated value of lost work days due to non-fatal injuries (by mechanism) initially treated in an emergency department during October 1, 2014 through September 30, 2015, Marketscan – Employer health insurance enrollees age 18-64 years, ED disposition: Treated and released (2015 USD)**

| Mechanism                                      | Measure                                       | Work absence          | Short-term disability | Workers' compensation | Total days and cost |
|------------------------------------------------|-----------------------------------------------|-----------------------|-----------------------|-----------------------|---------------------|
| Cut/pierce                                     | Injury patients, n                            | 699                   | 3,357                 | 2,242                 |                     |
|                                                | With >0 absences, n patients                  | 550                   | 320                   | 54                    |                     |
|                                                | No. absences (patients with >0), mean n days  | 36.20                 | 39.94                 | 42.46                 |                     |
|                                                | No. absences (all patients), mean n days      | 28.48                 | 3.81                  | 1.02                  |                     |
|                                                | Control enrollees, n                          | 3,148                 | 16,395                | 10,792                |                     |
|                                                | With >0 absences, n enrollees                 | 2,394                 | 893                   | 228                   |                     |
|                                                | No. absences (enrollees with >0), mean n days | 34.06                 | 41.37                 | 46.63                 |                     |
|                                                | No. absences (all enrollees), mean n days     | 25.90                 | 2.25                  | 0.99                  |                     |
|                                                | Estimated attributable absences and cost      |                       |                       |                       |                     |
|                                                | Absent days, simple mean                      | 2.58                  | 1.56                  | 0.03                  | 4.2                 |
| Absent days, regression-adjusted mean (95% CI) | 2.1 (0.1-4.0)                                 | 1.8 (1.1-2.6)         | NS                    | 3.9 (2.3-5.3)         |                     |
| Estimated cost, mean (95% CI)                  | \$288 (13-564)                                | \$256 (152-360)       | NS                    | \$544 (325-750)       |                     |
| Drowning/submersion                            | Injury patients, n                            | 1                     | 11                    | 9                     |                     |
|                                                | With >0 absences, n patients                  | 0                     | 2                     | 0                     |                     |
|                                                | No. absences (patients with >0), mean n days  | 0.00                  | 21.07                 | 0.00                  |                     |
|                                                | No. absences (all patients), mean n days      | 0.00                  | 3.83                  | 0.00                  |                     |
|                                                | Control enrollees, n                          | 5                     | 52                    | 41                    |                     |
|                                                | With >0 absences, n enrollees                 | 4                     | 3                     | 1                     |                     |
|                                                | No. absences (enrollees with >0), mean n days | 28.63                 | 11.67                 | 2.14                  |                     |
|                                                | No. absences (all enrollees), mean n days     | 22.90                 | 0.67                  | 0.05                  |                     |
|                                                | Estimated attributable absences and cost      |                       |                       |                       |                     |
|                                                | Absent days, simple mean                      | NC                    | NC                    | NC                    | NC                  |
| Absent days, regression-adjusted mean (95% CI) | NC                                            | NC                    | NC                    | NC                    |                     |
| Estimated cost, mean (95% CI)                  | NC                                            | NC                    | NC                    | NC                    |                     |
| Fall                                           | Injury patients, n                            | 1,104                 | 6,355                 | 3,951                 |                     |
|                                                | With >0 absences, n patients                  | 857                   | 1,235                 | 157                   |                     |
|                                                | No. absences (patients with >0), mean n days  | 40.70                 | 53.18                 | 51.56                 |                     |
|                                                | No. absences (all patients), mean n days      | 31.60                 | 10.33                 | 2.05                  |                     |
|                                                | Control enrollees, n                          | 4,884                 | 30,815                | 18,849                |                     |
|                                                | With >0 absences, n enrollees                 | 3,764                 | 1,951                 | 427                   |                     |
|                                                | No. absences (enrollees with >0), mean n days | 33.21                 | 42.22                 | 44.46                 |                     |
|                                                | No. absences (all enrollees), mean n days     | 25.59                 | 2.67                  | 1.01                  |                     |
|                                                | Estimated attributable absences and cost      |                       |                       |                       |                     |
|                                                | Absent days, simple mean                      | 6.01                  | 7.66                  | 1.04                  | 14.7                |
| Absent days, regression-adjusted mean (95% CI) | 4.8 (3.1-6.5)                                 | 9.2 (8.2-10.3)        | 1.0 (0.4-1.5)         | 15.0 (13.6-16.5)      |                     |
| Estimated cost, mean (95% CI)                  | \$676 (437-917)                               | \$1,298 (1,152-1,444) | \$135 (58-211)        | \$2,109 (1,907-2,321) |                     |
| Fire/burn                                      | Injury patients, n                            | 52                    | 285                   | 178                   |                     |
|                                                | With >0 absences, n patients                  | 41                    | 32                    | 3                     |                     |
|                                                | No. absences (patients with >0), mean n days  | 36.50                 | 26.21                 | 45.71                 |                     |
|                                                | No. absences (all patients), mean n days      | 28.78                 | 2.94                  | 0.77                  |                     |
|                                                | Control enrollees, n                          | 228                   | 1,375                 | 850                   |                     |
|                                                | With >0 absences, n enrollees                 | 182                   | 74                    | 15                    |                     |
|                                                | No. absences (enrollees with >0), mean n days | 34.85                 | 40.23                 | 40.52                 |                     |
|                                                | No. absences (all enrollees), mean n days     | 27.82                 | 2.17                  | 0.72                  |                     |
|                                                | Estimated attributable absences and cost      |                       |                       |                       |                     |

|                                                |                                                |       |       |       |    |
|------------------------------------------------|------------------------------------------------|-------|-------|-------|----|
|                                                | Absent days, simple mean                       | NC    | NC    | NC    | NC |
|                                                | Absent days, regression-adjusted mean (95% CI) | NC    | NC    | NC    | NC |
|                                                | Estimated cost, mean (95% CI)                  | NC    | NC    | NC    | NC |
| Fire/flame                                     | Injury patients, n                             | 11    | 56    | 43    |    |
|                                                | With >0 absences, n patients                   | 9     | 9     | 0     |    |
|                                                | No. absences (patients with >0), mean n days   | 32.09 | 24.52 | 0.00  |    |
|                                                | No. absences (all patients), mean n days       | 26.25 | 3.94  | 0.00  |    |
|                                                | Control enrollees, n                           | 49    | 273   | 204   |    |
|                                                | With >0 absences, n enrollees                  | 36    | 12    | 4     |    |
|                                                | No. absences (enrollees with >0), mean n days  | 33.29 | 32.92 | 52.32 |    |
|                                                | No. absences (all enrollees), mean n days      | 24.46 | 1.45  | 1.03  |    |
|                                                | Estimated attributable absences and cost       |       |       |       |    |
|                                                | Absent days, simple mean                       | NC    | NC    | NC    | NC |
| Absent days, regression-adjusted mean (95% CI) | NC                                             | NC    | NC    | NC    |    |
| Estimated cost, mean (95% CI)                  | NC                                             | NC    | NC    | NC    |    |
| Hot object/substance                           | Injury patients, n                             | 41    | 229   | 135   |    |
|                                                | With >0 absences, n patients                   | 32    | 23    | 3     |    |
|                                                | No. absences (patients with >0), mean n days   | 37.74 | 26.86 | 45.71 |    |
|                                                | No. absences (all patients), mean n days       | 29.46 | 2.70  | 1.02  |    |
|                                                | Control enrollees, n                           | 179   | 1,102 | 646   |    |
|                                                | With >0 absences, n enrollees                  | 146   | 62    | 11    |    |
|                                                | No. absences (enrollees with >0), mean n days  | 35.24 | 41.65 | 36.23 |    |
|                                                | No. absences (all enrollees), mean n days      | 28.74 | 2.34  | 0.62  |    |
|                                                | Estimated attributable absences and cost       |       |       |       |    |
|                                                | Absent days, simple mean                       | NC    | NC    | NC    | NC |
| Absent days, regression-adjusted mean (95% CI) | NC                                             | NC    | NC    | NC    |    |
| Estimated cost, mean (95% CI)                  | NC                                             | NC    | NC    | NC    |    |
| Firearm                                        | Injury patients, n                             | 10    | 37    | 22    |    |
|                                                | With >0 absences, n patients                   | 7     | 7     | 0     |    |
|                                                | No. absences (patients with >0), mean n days   | 36.78 | 66.84 | 0.00  |    |
|                                                | No. absences (all patients), mean n days       | 25.74 | 12.64 | 0.00  |    |
|                                                | Control enrollees, n                           | 38    | 176   | 96    |    |
|                                                | With >0 absences, n enrollees                  | 21    | 10    | 2     |    |
|                                                | No. absences (enrollees with >0), mean n days  | 28.06 | 34.86 | 69.29 |    |
|                                                | No. absences (all enrollees), mean n days      | 15.51 | 1.98  | 1.44  |    |
|                                                | Estimated attributable absences and cost       |       |       |       |    |
|                                                | Absent days, simple mean                       | NC    | NC    | NC    | NC |
| Absent days, regression-adjusted mean (95% CI) | NC                                             | NC    | NC    | NC    |    |
| Estimated cost, mean (95% CI)                  | NC                                             | NC    | NC    | NC    |    |
| Machinery                                      | Injury patients, n                             | 31    | 135   | 100   |    |
|                                                | With >0 absences, n patients                   | 25    | 21    | 4     |    |
|                                                | No. absences (patients with >0), mean n days   | 33.37 | 29.59 | 38.21 |    |
|                                                | No. absences (all patients), mean n days       | 26.91 | 4.60  | 1.53  |    |
|                                                | Control enrollees, n                           | 136   | 651   | 467   |    |
|                                                | With >0 absences, n enrollees                  | 111   | 30    | 11    |    |
|                                                | No. absences (enrollees with >0), mean n days  | 32.32 | 56.17 | 59.35 |    |
|                                                | No. absences (all enrollees), mean n days      | 26.38 | 2.59  | 1.40  |    |
|                                                | Estimated attributable absences and cost       |       |       |       |    |
|                                                | Absent days, simple mean                       | NC    | NC    | NC    | NC |
| Absent days, regression-adjusted mean (95% CI) | NC                                             | NC    | NC    | NC    |    |
| Estimated cost, mean (95% CI)                  | NC                                             | NC    | NC    | NC    |    |
| Motor vehicle traffic                          | Injury patients, n                             | 586   | 3,099 | 1,972 |    |

|               |                                                |                     |                       |                 |                       |
|---------------|------------------------------------------------|---------------------|-----------------------|-----------------|-----------------------|
|               | With >0 absences, n patients                   | 459                 | 633                   | 80              |                       |
|               | No. absences (patients with >0), mean n days   | 40.02               | 50.66                 | 65.95           |                       |
|               | No. absences (all patients), mean n days       | 31.35               | 10.35                 | 2.68            |                       |
|               | Control enrollees, n                           | 2,584               | 15,008                | 9,332           |                       |
|               | With >0 absences, n enrollees                  | 2,016               | 1,035                 | 200             |                       |
|               | No. absences (enrollees with >0), mean n days  | 33.12               | 40.28                 | 46.74           |                       |
|               | No. absences (all enrollees), mean n days      | 25.84               | 2.78                  | 1.00            |                       |
|               | Estimated attributable absences and cost       |                     |                       |                 |                       |
|               | Absent days, simple mean                       | 5.51                | 7.57                  | 1.68            | 14.8                  |
|               | Absent days, regression-adjusted mean (95% CI) | 4.0 (1.6-6.3)       | 9.5 (7.9-11.1)        | 2.5 (1.2-3.9)   | 16.0 (13.6-18.4)      |
|               | Estimated cost, mean (95% CI)                  | \$560 (229-890)     | \$1,337 (1,114-1,561) | \$353 (165-541) | \$2,250 (1,910-2,592) |
| Occupant      | Injury patients, n                             | 399                 | 2,188                 | 1,376           |                       |
|               | With >0 absences, n patients                   | 312                 | 443                   | 60              |                       |
|               | No. absences (patients with >0), mean n days   | 39.10               | 53.00                 | 68.82           |                       |
|               | No. absences (all patients), mean n days       | 30.57               | 10.73                 | 3.00            |                       |
|               | Control enrollees, n                           | 1,749               | 10,564                | 6,489           |                       |
|               | With >0 absences, n enrollees                  | 1,347               | 738                   | 146             |                       |
|               | No. absences (enrollees with >0), mean n days  | 32.20               | 41.08                 | 50.23           |                       |
|               | No. absences (all enrollees), mean n days      | 24.80               | 2.87                  | 1.13            |                       |
|               | Estimated attributable absences and cost       |                     |                       |                 |                       |
|               | Absent days, simple mean                       | 5.77                | 7.86                  | 1.87            | 15.5                  |
|               | Absent days, regression-adjusted mean (95% CI) | 4.1 (1.3-6.9)       | 10.5 (8.3-12.7)       | 3.4 (1.3-5.5)   | 18.0 (14.8-21.0)      |
|               | Estimated cost, mean (95% CI)                  | \$574 (177-972)     | \$1,475 (1,163-1,788) | \$477 (180-772) | \$2,526 (2,087-2,949) |
| Motorcyclist  | Injury patients, n                             | 83                  | 253                   | 191             |                       |
|               | With >0 absences, n patients                   | 68                  | 77                    | 5               |                       |
|               | No. absences (patients with >0), mean n days   | 51.12               | 36.44                 | 38.29           |                       |
|               | No. absences (all patients), mean n days       | 41.88               | 11.09                 | 1.00            |                       |
|               | Control enrollees, n                           | 376                 | 1,249                 | 921             |                       |
|               | With >0 absences, n enrollees                  | 322                 | 59                    | 15              |                       |
|               | No. absences (enrollees with >0), mean n days  | 37.07               | 37.31                 | 35.95           |                       |
|               | No. absences (all enrollees), mean n days      | 31.75               | 1.76                  | 0.59            |                       |
|               | Estimated attributable absences and cost       |                     |                       |                 |                       |
|               | Absent days, simple mean                       | 10.13               | 9.33                  | NC              | 19.5                  |
|               | Absent days, regression-adjusted mean (95% CI) | 8.4 (1.0-15.8)      | 15.0 (7.9-22.0)       | NC              | 23.4 (15.6-30.4)      |
|               | Estimated cost, mean (95% CI)                  | \$1,181 (145-2,216) | \$2,103 (1,107-3,099) | NC              | \$3,284 (2,199-4,280) |
| Pedal cyclist | Injury patients, n                             | 10                  | 36                    | 18              |                       |
|               | With >0 absences, n patients                   | 8                   | 6                     | 0               |                       |
|               | No. absences (patients with >0), mean n days   | 39.00               | 67.14                 | 0.00            |                       |
|               | No. absences (all patients), mean n days       | 31.20               | 11.19                 | 0.00            |                       |
|               | Control enrollees, n                           | 44                  | 175                   | 82              |                       |
|               | With >0 absences, n enrollees                  | 31                  | 6                     | 2               |                       |
|               | No. absences (enrollees with >0), mean n days  | 35.87               | 46.79                 | 17.50           |                       |
|               | No. absences (all enrollees), mean n days      | 25.27               | 1.60                  | 0.43            |                       |
|               | Estimated attributable absences and cost       |                     |                       |                 |                       |
|               | Absent days, simple mean                       | NC                  | NC                    | NC              | NC                    |
|               | Absent days, regression-adjusted mean (95% CI) | NC                  | NC                    | NC              | NC                    |
|               | Estimated cost, mean (95% CI)                  | NC                  | NC                    | NC              | NC                    |
| Pedestrian    | Injury patients, n                             | 13                  | 55                    | 31              |                       |
|               | With >0 absences, n patients                   | 10                  | 14                    | 4               |                       |
|               | No. absences (patients with >0), mean n days   | 28.39               | 64.95                 | 38.57           |                       |
|               | No. absences (all patients), mean n days       | 21.84               | 16.53                 | 4.98            |                       |
|               | Control enrollees, n                           | 58                  | 270                   | 146             |                       |

|                                                |                                                |                   |       |                   |     |
|------------------------------------------------|------------------------------------------------|-------------------|-------|-------------------|-----|
|                                                | With >0 absences, n enrollees                  | 45                | 17    | 2                 |     |
|                                                | No. absences (enrollees with >0), mean n days  | 34.38             | 45.17 | 1.07              |     |
|                                                | No. absences (all enrollees), mean n days      | 26.67             | 2.84  | 0.01              |     |
|                                                | Estimated attributable absences and cost       |                   |       |                   |     |
|                                                | Absent days, simple mean                       | NC                | NC    | NC                | NC  |
|                                                | Absent days, regression-adjusted mean (95% CI) | NC                | NC    | NC                | NC  |
|                                                | Estimated cost, mean (95% CI)                  | NC                | NC    | NC                | NC  |
| Unspecified MV                                 | Injury patients, n                             | 75                | 532   | 334               |     |
|                                                | With >0 absences, n patients                   | 56                | 86    | 11                |     |
|                                                | No. absences (patients with >0), mean n days   | 34.40             | 49.76 | 72.79             |     |
|                                                | No. absences (all patients), mean n days       | 25.68             | 8.04  | 2.40              |     |
|                                                | Control enrollees, n                           | 330               | 2,583 | 1,588             |     |
|                                                | With >0 absences, n enrollees                  | 251               | 205   | 32                |     |
|                                                | No. absences (enrollees with >0), mean n days  | 32.48             | 37.71 | 42.66             |     |
|                                                | No. absences (all enrollees), mean n days      | 24.71             | 2.99  | 0.86              |     |
|                                                | Estimated attributable absences and cost       |                   |       |                   |     |
|                                                | Absent days, simple mean                       | 0.97              | 5.05  | NC                | 6.0 |
| Absent days, regression-adjusted mean (95% CI) | NS                                             | 5.5 (3.0-8.1)     | NC    | 5.5 (3.0-8.1)     |     |
| Estimated cost, mean (95% CI)                  | NS                                             | \$776 (418-1,135) | NC    | \$776 (418-1,135) |     |
| Other pedal cyclist                            | Injury patients, n                             | 122               | 471   | 277               |     |
|                                                | With >0 absences, n patients                   | 89                | 59    | 2                 |     |
|                                                | No. absences (patients with >0), mean n days   | 38.36             | 39.47 | 54.64             |     |
|                                                | No. absences (all patients), mean n days       | 27.99             | 4.94  | 0.39              |     |
|                                                | Control enrollees, n                           | 551               | 2,301 | 1,336             |     |
|                                                | With >0 absences, n enrollees                  | 418               | 102   | 24                |     |
|                                                | No. absences (enrollees with >0), mean n days  | 36.17             | 34.96 | 46.79             |     |
|                                                | No. absences (all enrollees), mean n days      | 27.44             | 1.55  | 0.84              |     |
|                                                | Estimated attributable absences and cost       |                   |       |                   |     |
|                                                | Absent days, simple mean                       | 0.55              | 3.39  | NC                | 3.9 |
| Absent days, regression-adjusted mean (95% CI) | NS                                             | 5.0 (2.0-8.0)     | NC    | 5.0 (2.0-8.0)     |     |
| Estimated cost, mean (95% CI)                  | NS                                             | \$704 (278-1,129) | NC    | \$704 (278-1,129) |     |
| Other pedestrian                               | Injury patients, n                             | 4                 | 16    | 13                |     |
|                                                | With >0 absences, n patients                   | 4                 | 2     | 0                 |     |
|                                                | No. absences (patients with >0), mean n days   | 66.82             | 60.36 | 0.00              |     |
|                                                | No. absences (all patients), mean n days       | 66.82             | 7.54  | 0.00              |     |
|                                                | Control enrollees, n                           | 17                | 77    | 62                |     |
|                                                | With >0 absences, n enrollees                  | 15                | 2     | 2                 |     |
|                                                | No. absences (enrollees with >0), mean n days  | 33.77             | 67.86 | 110.00            |     |
|                                                | No. absences (all enrollees), mean n days      | 29.80             | 1.76  | 3.55              |     |
|                                                | Estimated attributable absences and cost       |                   |       |                   |     |
|                                                | Absent days, simple mean                       | NC                | NC    | NC                | NC  |
| Absent days, regression-adjusted mean (95% CI) | NC                                             | NC                | NC    | NC                |     |
| Estimated cost, mean (95% CI)                  | NC                                             | NC                | NC    | NC                |     |
| Other transport                                | Injury patients, n                             | 79                | 374   | 250               |     |
|                                                | With >0 absences, n patients                   | 57                | 78    | 7                 |     |
|                                                | No. absences (patients with >0), mean n days   | 41.68             | 49.11 | 25.51             |     |
|                                                | No. absences (all patients), mean n days       | 30.07             | 10.24 | 0.71              |     |
|                                                | Control enrollees, n                           | 361               | 1,817 | 1,168             |     |
|                                                | With >0 absences, n enrollees                  | 281               | 93    | 28                |     |
|                                                | No. absences (enrollees with >0), mean n days  | 35.14             | 38.87 | 40.28             |     |
|                                                | No. absences (all enrollees), mean n days      | 27.35             | 1.99  | 0.97              |     |
|                                                | Estimated attributable absences and cost       |                   |       |                   |     |

|                      |                                                |                 |                       |                |                       |
|----------------------|------------------------------------------------|-----------------|-----------------------|----------------|-----------------------|
|                      | Absent days, simple mean                       | 2.72            | 8.25                  | NC             | 11.0                  |
|                      | Absent days, regression-adjusted mean (95% CI) | NS              | 14.2 (7.2-21.2)       | NC             | 14.2 (7.2-21.2)       |
|                      | Estimated cost, mean (95% CI)                  | NS              | \$1,998 (1,017-2,979) | NC             | \$1,998 (1,017-2,979) |
| Natural/enviromental | Injury patients, n                             | 38              | 133                   | 85             |                       |
|                      | With >0 absences, n patients                   | 29              | 12                    | 4              |                       |
|                      | No. absences (patients with >0), mean n days   | 41.37           | 45.24                 | 101.07         |                       |
|                      | No. absences (all patients), mean n days       | 31.57           | 4.08                  | 4.76           |                       |
|                      | Control enrollees, n                           | 180             | 655                   | 415            |                       |
|                      | With >0 absences, n enrollees                  | 147             | 45                    | 10             |                       |
|                      | No. absences (enrollees with >0), mean n days  | 35.07           | 52.02                 | 42.36          |                       |
|                      | No. absences (all enrollees), mean n days      | 28.64           | 3.57                  | 1.02           |                       |
|                      | Estimated attributable absences and cost       |                 |                       |                |                       |
|                      | Absent days, simple mean                       | NC              | NC                    | NC             | NC                    |
|                      | Absent days, regression-adjusted mean (95% CI) | NC              | NC                    | NC             | NC                    |
|                      | Estimated cost, mean (95% CI)                  | NC              | NC                    | NC             | NC                    |
| Bites and stings     | Injury patients, n                             | 274             | 1,387                 | 892            |                       |
|                      | With >0 absences, n patients                   | 202             | 122                   | 32             |                       |
|                      | No. absences (patients with >0), mean n days   | 36.51           | 39.34                 | 50.27          |                       |
|                      | No. absences (all patients), mean n days       | 26.91           | 3.46                  | 1.80           |                       |
|                      | Control enrollees, n                           | 1,233           | 6,782                 | 4,313          |                       |
|                      | With >0 absences, n enrollees                  | 946             | 414                   | 98             |                       |
|                      | No. absences (enrollees with >0), mean n days  | 34.11           | 38.86                 | 50.81          |                       |
|                      | No. absences (all enrollees), mean n days      | 26.17           | 2.37                  | 1.15           |                       |
|                      | Estimated attributable absences and cost       |                 |                       |                |                       |
|                      | Absent days, simple mean                       | 0.74            | 1.09                  | NC             | 1.8                   |
|                      | Absent days, regression-adjusted mean (95% CI) | NS              | 1.5 (0.3-2.6)         | NC             | 1.5 (0.3-2.6)         |
|                      | Estimated cost, mean (95% CI)                  | NS              | \$204 (45-363)        | NC             | \$204 (45-363)        |
| Overexertion         | Injury patients, n                             | 514             | 2,750                 | 1,854          |                       |
|                      | With >0 absences, n patients                   | 400             | 482                   | 75             |                       |
|                      | No. absences (patients with >0), mean n days   | 37.58           | 49.53                 | 64.00          |                       |
|                      | No. absences (all patients), mean n days       | 29.25           | 8.68                  | 2.59           |                       |
|                      | Control enrollees, n                           | 2,299           | 13,353                | 8,820          |                       |
|                      | With >0 absences, n enrollees                  | 1,730           | 817                   | 207            |                       |
|                      | No. absences (enrollees with >0), mean n days  | 32.61           | 42.19                 | 51.07          |                       |
|                      | No. absences (all enrollees), mean n days      | 24.54           | 2.58                  | 1.20           |                       |
|                      | Estimated attributable absences and cost       |                 |                       |                |                       |
|                      | Absent days, simple mean                       | 4.71            | 6.10                  | 1.39           | 12.2                  |
|                      | Absent days, regression-adjusted mean (95% CI) | 3.8 (1.4-6.2)   | 7.7 (6.2-9.2)         | 1.2 (0.2-2.1)  | 12.6 (10.5-14.6)      |
|                      | Estimated cost, mean (95% CI)                  | \$531 (195-866) | \$1,083 (869-1,296)   | \$162 (32-291) | \$1,776 (1,472-2,059) |
| Poisoning            | Injury patients, n                             | 39              | 201                   | 120            |                       |
|                      | With >0 absences, n patients                   | 33              | 43                    | 8              |                       |
|                      | No. absences (patients with >0), mean n days   | 52.45           | 53.55                 | 30.09          |                       |
|                      | No. absences (all patients), mean n days       | 44.38           | 11.46                 | 2.01           |                       |
|                      | Control enrollees, n                           | 171             | 957                   | 553            |                       |
|                      | With >0 absences, n enrollees                  | 146             | 73                    | 13             |                       |
|                      | No. absences (enrollees with >0), mean n days  | 42.76           | 44.60                 | 30.11          |                       |
|                      | No. absences (all enrollees), mean n days      | 36.51           | 3.40                  | 0.71           |                       |
|                      | Estimated attributable absences and cost       |                 |                       |                |                       |
|                      | Absent days, simple mean                       | NC              | NC                    | NC             | NC                    |
|                      | Absent days, regression-adjusted mean (95% CI) | NC              | NC                    | NC             | NC                    |
|                      | Estimated cost, mean (95% CI)                  | NC              | NC                    | NC             | NC                    |
| Struck by/against    | Injury patients, n                             | 633             | 3,206                 | 2,007          |                       |



|                                                |                                                |                   |                 |                       |                 |
|------------------------------------------------|------------------------------------------------|-------------------|-----------------|-----------------------|-----------------|
|                                                | With >0 absences, n patients                   | 509               | 443             | 61                    |                 |
|                                                | No. absences (patients with >0), mean n days   | 35.12             | 45.28           | 76.87                 |                 |
|                                                | No. absences (all patients), mean n days       | 28.24             | 6.26            | 2.34                  |                 |
|                                                | Control enrollees, n                           | 2,798             | 15,547          | 9,562                 |                 |
|                                                | With >0 absences, n enrollees                  | 2,185             | 856             | 194                   |                 |
|                                                | No. absences (enrollees with >0), mean n days  | 33.60             | 38.31           | 51.53                 |                 |
|                                                | No. absences (all enrollees), mean n days      | 26.24             | 2.11            | 1.05                  |                 |
|                                                | Estimated attributable absences and cost       |                   |                 |                       |                 |
|                                                | Absent days, simple mean                       | 2.00              | 4.15            | 1.29                  | 7.4             |
|                                                | Absent days, regression-adjusted mean (95% CI) | NS                | 4.5 (3.5-5.4)   | NS                    | 4.5 (3.5-5.4)   |
|                                                | Estimated cost, mean (95% CI)                  | NS                | \$629 (494-763) | NS                    | \$629 (494-763) |
| Suffocation                                    | Injury patients, n                             | 5                 | 32              | 28                    |                 |
|                                                | With >0 absences, n patients                   | 4                 | 5               | 0                     |                 |
|                                                | No. absences (patients with >0), mean n days   | 28.33             | 56.57           | 0.00                  |                 |
|                                                | No. absences (all patients), mean n days       | 22.66             | 8.84            | 0.00                  |                 |
|                                                | Control enrollees, n                           | 22                | 158             | 138                   |                 |
|                                                | With >0 absences, n enrollees                  | 18                | 6               | 3                     |                 |
|                                                | No. absences (enrollees with >0), mean n days  | 27.29             | 40.71           | 43.33                 |                 |
|                                                | No. absences (all enrollees), mean n days      | 22.32             | 1.55            | 0.94                  |                 |
|                                                | Estimated attributable absences and cost       |                   |                 |                       |                 |
|                                                | Absent days, simple mean                       | NC                | NC              | NC                    | NC              |
| Absent days, regression-adjusted mean (95% CI) | NC                                             | NC                | NC              | NC                    |                 |
| Estimated cost, mean (95% CI)                  | NC                                             | NC                | NC              | NC                    |                 |
| Other specified, calssifiable                  | Injury patients, n                             | 246               | 1,162           | 794                   |                 |
|                                                | With >0 absences, n patients                   | 173               | 114             | 31                    |                 |
|                                                | No. absences (patients with >0), mean n days   | 34.28             | 48.83           | 31.77                 |                 |
|                                                | No. absences (all patients), mean n days       | 24.11             | 4.79            | 1.24                  |                 |
|                                                | Control enrollees, n                           | 1,113             | 5,623           | 3,800                 |                 |
|                                                | With >0 absences, n enrollees                  | 835               | 320             | 92                    |                 |
|                                                | No. absences (enrollees with >0), mean n days  | 34.52             | 40.74           | 45.92                 |                 |
|                                                | No. absences (all enrollees), mean n days      | 25.90             | 2.32            | 1.11                  |                 |
|                                                | Estimated attributable absences and cost       |                   |                 |                       |                 |
|                                                | Absent days, simple mean                       | -1.79             | 2.47            | NC                    | .7              |
| Absent days, regression-adjusted mean (95% CI) | NS                                             | 2.9 (1.4-4.5)     | NC              | 2.9 (1.4-4.5)         |                 |
| Estimated cost, mean (95% CI)                  | NS                                             | \$411 (193-627)   | NC              | \$411 (193-627)       |                 |
| Other specified, NEC                           | Injury patients, n                             | 263               | 1,512           | 1,062                 |                 |
|                                                | With >0 absences, n patients                   | 205               | 255             | 50                    |                 |
|                                                | No. absences (patients with >0), mean n days   | 43.18             | 49.95           | 57.21                 |                 |
|                                                | No. absences (all patients), mean n days       | 33.66             | 8.42            | 2.69                  |                 |
|                                                | Control enrollees, n                           | 1,210             | 7,313           | 5,053                 |                 |
|                                                | With >0 absences, n enrollees                  | 915               | 415             | 107                   |                 |
|                                                | No. absences (enrollees with >0), mean n days  | 34.13             | 41.48           | 52.34                 |                 |
|                                                | No. absences (all enrollees), mean n days      | 25.81             | 2.35            | 1.11                  |                 |
|                                                | Estimated attributable absences and cost       |                   |                 |                       |                 |
|                                                | Absent days, simple mean                       | 7.85              | 6.07            | 1.58                  | 15.5            |
| Absent days, regression-adjusted mean (95% CI) | 5.6 (1.7-9.4)                                  | 6.6 (4.8-8.5)     | 1.5 (0.2-2.7)   | 13.6 (10.3-16.9)      |                 |
| Estimated cost, mean (95% CI)                  | \$780 (238-1,323)                              | \$932 (673-1,190) | \$204 (30-377)  | \$1,916 (1,448-2,375) |                 |
| Unspecified                                    | Injury patients, n                             | 216               | 1,376           | 923                   |                 |
|                                                | With >0 absences, n patients                   | 145               | 228             | 30                    |                 |
|                                                | No. absences (patients with >0), mean n days   | 35.98             | 48.66           | 53.00                 |                 |
|                                                | No. absences (all patients), mean n days       | 24.16             | 8.06            | 1.72                  |                 |
|                                                | Control enrollees, n                           | 926               | 6,688           | 4,383                 |                 |

|                 |                                                |                 |                   |                 |                       |
|-----------------|------------------------------------------------|-----------------|-------------------|-----------------|-----------------------|
|                 | With >0 absences, n enrollees                  | 646             | 454               | 95              |                       |
|                 | No. absences (enrollees with >0), mean n days  | 30.87           | 42.77             | 45.20           |                       |
|                 | No. absences (all enrollees), mean n days      | 21.54           | 2.90              | 0.98            |                       |
|                 | Estimated attributable absences and cost       |                 |                   |                 |                       |
|                 | Absent days, simple mean                       | 2.62            | 5.16              | NC              | 7.8                   |
|                 | Absent days, regression-adjusted mean (95% CI) | NS              | 6.4 (4.4-8.3)     | NC              | 6.4 (4.4-8.3)         |
|                 | Estimated cost, mean (95% CI)                  | NS              | \$893 (617-1,170) | NC              | \$893 (617-1,170)     |
| Adverse effects | Injury patients, n                             | 4               | 33                | 19              |                       |
|                 | With >0 absences, n patients                   | 4               | 3                 | 0               |                       |
|                 | No. absences (patients with >0), mean n days   | 103.94          | 103.33            | 0.00            |                       |
|                 | No. absences (all patients), mean n days       | 103.94          | 9.39              | 0.00            |                       |
|                 | Control enrollees, n                           | 18              | 164               | 90              |                       |
|                 | With >0 absences, n enrollees                  | 15              | 9                 | 2               |                       |
|                 | No. absences (enrollees with >0), mean n days  | 28.71           | 36.03             | 68.57           |                       |
|                 | No. absences (all enrollees), mean n days      | 23.92           | 1.98              | 1.52            |                       |
|                 | Estimated attributable absences and cost       |                 |                   |                 |                       |
|                 | Absent days, simple mean                       | NC              | NC                | NC              | NC                    |
|                 | Absent days, regression-adjusted mean (95% CI) | NC              | NC                | NC              | NC                    |
|                 | Estimated cost, mean (95% CI)                  | NC              | NC                | NC              | NC                    |
| Ecode missing   | Injury patients, n                             | 5,974           | 39,906            | 25,077          |                       |
|                 | With >0 absences, n patients                   | 4,400           | 6,118             | 1,072           |                       |
|                 | No. absences (patients with >0), mean n days   | 37.36           | 47.76             | 54.17           |                       |
|                 | No. absences (all patients), mean n days       | 27.52           | 7.32              | 2.32            |                       |
|                 | Control enrollees, n                           | 26,798          | 194,622           | 120,193         |                       |
|                 | With >0 absences, n enrollees                  | 19,465          | 11,802            | 2,725           |                       |
|                 | No. absences (enrollees with >0), mean n days  | 31.84           | 41.45             | 46.18           |                       |
|                 | No. absences (all enrollees), mean n days      | 23.13           | 2.51              | 1.05            |                       |
|                 | Estimated attributable absences and cost       |                 |                   |                 |                       |
|                 | Absent days, simple mean                       | 4.39            | 4.81              | 1.27            | 10.5                  |
|                 | Absent days, regression-adjusted mean (95% CI) | 3.3 (2.6-4.0)   | 5.6 (5.3-5.9)     | 1.3 (1.1-1.6)   | 10.2 (9.6-10.8)       |
|                 | Estimated cost, mean (95% CI)                  | \$468 (367-568) | \$785 (738-831)   | \$183 (148-218) | \$1,435 (1,351-1,517) |
| Total           | Injury patients, n                             | 10,894          | 65,838            | 41,875          |                       |
|                 | With >0 absences, n patients                   | 8,193           | 10,214            | 1,670           |                       |
|                 | No. absences (patients with >0), mean n days   | 37.83           | 48.22             | 54.79           |                       |
|                 | No. absences (all patients), mean n days       | 28.45           | 7.48              | 2.18            |                       |
|                 | Control enrollees, n                           | 48,720          | 320,529           | 200,313         |                       |
|                 | With >0 absences, n enrollees                  | 36,254          | 19,404            | 4,484           |                       |
|                 | No. absences (enrollees with >0), mean n days  | 32.65           | 41.32             | 46.71           |                       |
|                 | No. absences (all enrollees), mean n days      | 24.29           | 2.50              | 1.05            |                       |
|                 | Estimated attributable absences and cost       |                 |                   |                 |                       |
|                 | Absent days, simple mean                       | 4.16            | 4.98              | 1.13            | 10.3                  |
|                 | Absent days, regression-adjusted mean (95% CI) | 3.2 (2.6-3.7)   | 5.7 (5.5-6.0)     | 1.1 (0.9-1.3)   | 10.0 (9.5-10.4)       |
|                 | Estimated cost, mean (95% CI)                  | \$444 (370-519) | \$803 (766-839)   | \$155 (129-181) | \$1,402 (1,336-1,467) |

Notes. All costs are 2015 USD. NC = not calculated, due to low number of observations (<50 injury or control enrollees with >0 absences) in the data source. NEC = Not elsewhere classifiable. NS = not significant, the regression-adjusted attributable number of lost work days due to the injury type was not statistically significantly higher among injured patients compared to control enrollees.

Values are mean (95% confidence interval [CI] or prediction interval [PI])—in the case that multiple estimates by absence type were probabilistically combined). For injury types with just one attributable absence type value reported, "Total" days reflects that absence type's mean (95% CI) regression-adjusted value. Otherwise, variance for "Total" days estimates was based on a probabilistic combination of variance for multiple absence type estimates (e.g., workplace absence + short-term disability absence estimates for Cut/pierce injuries) using Excel Palisade @RISK (Ithaca, NY). For those calculations, 1,000 sums drawn from Pert distributions representing each absence type—with mean (95% CI) estimates of absent days by type included as the distributions' most likely, minimum, and maximum values—were computed, and the middle 95% of resulting values comprise the reported PI range. Total cost was assessed as the mean number of days and 95% CI or PI values multiplied by the estimated value of lost work days described in the Methods text (\$141).

Source data: MarketScan Health and Productivity Management dataset, 2014-2016. Injury classification is based on the ICD-9-CM E-code Matrix

**STable 5. Number of injury and control enrollees and estimated average per-person one-year number and associated value of lost work days due to non-fatal injuries (by body region) initially treated in an emergency department during October 1, 2014 through September 30, 2015, Marketscan – Employer health insurance enrollees age 18-64 years, ED disposition: Hospitalized (2015 USD)**

| Body Region          | Body Region                                    | Measure                                        | Work absence           | Short-term disability   | Workers' compensation  | Total days and cost     |  |
|----------------------|------------------------------------------------|------------------------------------------------|------------------------|-------------------------|------------------------|-------------------------|--|
| Head and neck        | Traumatic brain injury                         | Injury patients, n                             | 37                     | 202                     | 115                    |                         |  |
|                      |                                                | With >0 absences, n patients                   | 29                     | 91                      | 3                      |                         |  |
|                      |                                                | No. absences (patients with >0), mean n days   | 60.81                  | 64.77                   | 6.19                   |                         |  |
|                      |                                                | No. absences (all patients), mean n days       | 47.66                  | 29.18                   | 0.16                   |                         |  |
|                      |                                                | Control enrollees, n                           | 148                    | 987                     | 538                    |                         |  |
|                      |                                                | With >0 absences, n enrollees                  | 123                    | 56                      | 13                     |                         |  |
|                      |                                                | No. absences (enrollees with >0), mean n days  | 33.27                  | 44.03                   | 49.73                  |                         |  |
|                      |                                                | No. absences (all enrollees), mean n days      | 27.65                  | 2.50                    | 1.20                   |                         |  |
|                      |                                                | Estimated attributable absences and cost       |                        |                         |                        |                         |  |
|                      |                                                | Absent days, simple mean                       | NC                     | 26.68                   | NC                     | 26.7                    |  |
|                      |                                                | Absent days, regression-adjusted mean (95% CI) | NC                     | 77.0 (15.8-138.2)       | NC                     | 77.0 (15.8-138.2)       |  |
|                      |                                                | Estimated cost, mean (95% CI)                  | NC                     | \$10,828 (2,219-19,437) | NC                     | \$10,828 (2,219-19,437) |  |
|                      | Other head, face, and neck                     | Injury patients, n                             | 31                     | 132                     | 84                     |                         |  |
|                      |                                                | With >0 absences, n patients                   | 23                     | 70                      | 4                      |                         |  |
|                      |                                                | No. absences (patients with >0), mean n days   | 42.91                  | 69.45                   | 8.93                   |                         |  |
|                      |                                                | No. absences (all patients), mean n days       | 31.83                  | 36.83                   | 0.43                   |                         |  |
|                      |                                                | Control enrollees, n                           | 136                    | 641                     | 396                    |                         |  |
|                      |                                                | With >0 absences, n enrollees                  | 107                    | 37                      | 9                      |                         |  |
|                      |                                                | No. absences (enrollees with >0), mean n days  | 33.96                  | 37.34                   | 16.35                  |                         |  |
|                      |                                                | No. absences (all enrollees), mean n days      | 26.72                  | 2.16                    | 0.37                   |                         |  |
|                      |                                                | Estimated attributable absences and cost       |                        |                         |                        |                         |  |
|                      |                                                | Absent days, simple mean                       | NC                     | NC                      | NC                     | NC                      |  |
|                      |                                                | Absent days, regression-adjusted mean (95% CI) | NC                     | NC                      | NC                     | NC                      |  |
|                      |                                                | Estimated cost, mean (95% CI)                  | NC                     | NC                      | NC                     | NC                      |  |
| Head and neck, Total | Injury patients, n                             | 68                                             | 334                    | 199                     |                        |                         |  |
|                      | With >0 absences, n patients                   | 52                                             | 161                    | 7                       |                        |                         |  |
|                      | No. absences (patients with >0), mean n days   | 52.89                                          | 66.81                  | 7.76                    |                        |                         |  |
|                      | No. absences (all patients), mean n days       | 40.44                                          | 32.20                  | 0.27                    |                        |                         |  |
|                      | Control enrollees, n                           | 284                                            | 1,628                  | 934                     |                        |                         |  |
|                      | With >0 absences, n enrollees                  | 230                                            | 93                     | 22                      |                        |                         |  |
|                      | No. absences (enrollees with >0), mean n days  | 33.59                                          | 41.37                  | 36.07                   |                        |                         |  |
|                      | No. absences (all enrollees), mean n days      | 27.20                                          | 2.36                   | 0.85                    |                        |                         |  |
|                      | Estimated attributable absences and cost       |                                                |                        |                         |                        |                         |  |
|                      | Absent days, simple mean                       | 13.24                                          | 29.84                  | NC                      | 43.1                   |                         |  |
|                      | Absent days, regression-adjusted mean (95% CI) | 10.7 (0.9-20.5)                                | 59.7 (31.9-87.6)       | NC                      | 70.4 (48.7-90.5)       |                         |  |
|                      | Estimated cost, mean (95% CI)                  | \$1,504 (127-2,881)                            | \$8,395 (4,478-12,314) | NC                      | \$9,900 (6,844-12,727) |                         |  |
| Spine and back       | Spinal cord (SCI)                              | Injury patients, n                             | 0                      | 5                       | 2                      |                         |  |
|                      |                                                | With >0 absences, n patients                   | 0                      | 3                       | 0                      |                         |  |
|                      |                                                | No. absences (patients with >0), mean n days   | 0.00                   | 217.14                  | 0.00                   |                         |  |
|                      |                                                | No. absences (all patients), mean n days       | 0.00                   | 130.29                  | 0.00                   |                         |  |
|                      |                                                | Control enrollees, n                           | 0                      | 22                      | 10                     |                         |  |
|                      |                                                | With >0 absences, n enrollees                  | 0                      | 0                       | 0                      |                         |  |
|                      |                                                | No. absences (enrollees with >0), mean n days  | 0.00                   | 0.00                    | 0.00                   |                         |  |
|                      |                                                | No. absences (all enrollees), mean n days      | 0.00                   | 0.00                    | 0.00                   |                         |  |
|                      |                                                | Estimated attributable absences and cost       |                        |                         |                        |                         |  |
|                      |                                                | Absent days, simple mean                       | NC                     | NC                      | NC                     | NC                      |  |
|                      |                                                | Absent days, regression-adjusted mean (95% CI) | NC                     | NC                      | NC                     | NC                      |  |
|                      |                                                | Estimated cost, mean (95% CI)                  | NC                     | NC                      | NC                     | NC                      |  |
|                      | Vertebral column (VCI)                         | Injury patients, n                             | 55                     | 238                     | 159                    |                         |  |
|                      |                                                | With >0 absences, n patients                   | 44                     | 125                     | 4                      |                         |  |
|                      |                                                | No. absences (patients with >0), mean n days   | 81.69                  | 80.97                   | 81.43                  |                         |  |
|                      |                                                | No. absences (all patients), mean n days       | 65.35                  | 42.53                   | 2.05                   |                         |  |

|             |                       |                                                |                       |                        |        |                         |
|-------------|-----------------------|------------------------------------------------|-----------------------|------------------------|--------|-------------------------|
|             |                       | Control enrollees, n                           | 240                   | 1,156                  | 748    |                         |
|             |                       | With >0 absences, n enrollees                  | 181                   | 72                     | 11     |                         |
|             |                       | No. absences (enrollees with >0), mean n days  | 33.05                 | 37.30                  | 25.78  |                         |
|             |                       | No. absences (all enrollees), mean n days      | 24.93                 | 2.32                   | 0.38   |                         |
|             |                       | Estimated attributable absences and cost       |                       |                        |        |                         |
|             |                       | Absent days, simple mean                       | NC                    | 40.21                  | NC     | 40.2                    |
|             |                       | Absent days, regression-adjusted mean (95% CI) | NC                    | 61.9 (35.3-88.4)       | NC     | 61.9 (35.3-88.4)        |
|             |                       | Estimated cost, mean (95% CI)                  | NC                    | \$8,696 (4,965-12,428) | NC     | \$8,696 (4,965-12,428)  |
|             | Spine and back, Total | Injury patients, n                             | 55                    | 243                    | 161    |                         |
|             |                       | With >0 absences, n patients                   | 44                    | 128                    | 4      |                         |
|             |                       | No. absences (patients with >0), mean n days   | 81.69                 | 84.16                  | 81.43  |                         |
|             |                       | No. absences (all patients), mean n days       | 65.35                 | 44.33                  | 2.02   |                         |
|             |                       | Control enrollees, n                           | 240                   | 1,178                  | 758    |                         |
|             |                       | With >0 absences, n enrollees                  | 181                   | 72                     | 11     |                         |
|             |                       | No. absences (enrollees with >0), mean n days  | 33.05                 | 37.30                  | 25.78  |                         |
|             |                       | No. absences (all enrollees), mean n days      | 24.93                 | 2.28                   | 0.37   |                         |
|             |                       | Estimated attributable absences and cost       |                       |                        |        |                         |
|             |                       | Absent days, simple mean                       | NC                    | 42.05                  | NC     | 42.1                    |
|             |                       | Absent days, regression-adjusted mean (95% CI) | NC                    | 62.8 (37.7-88.0)       | NC     | 62.8 (37.7-88.0)        |
|             |                       | Estimated cost, mean (95% CI)                  | NC                    | \$8,834 (5,297-12,372) | NC     | \$8,834 (5,297-12,372)  |
| Torso       | Torso                 | Injury patients, n                             | 80                    | 392                    | 243    |                         |
|             |                       | With >0 absences, n patients                   | 64                    | 169                    | 8      |                         |
|             |                       | No. absences (patients with >0), mean n days   | 57.64                 | 65.25                  | 35.00  |                         |
|             |                       | No. absences (all patients), mean n days       | 46.11                 | 28.13                  | 1.15   |                         |
|             |                       | Control enrollees, n                           | 373                   | 1,925                  | 1,184  |                         |
|             |                       | With >0 absences, n enrollees                  | 291                   | 112                    | 34     |                         |
|             |                       | No. absences (enrollees with >0), mean n days  | 35.76                 | 39.71                  | 57.42  |                         |
|             |                       | No. absences (all enrollees), mean n days      | 27.90                 | 2.31                   | 1.65   |                         |
|             |                       | Estimated attributable absences and cost       |                       |                        |        |                         |
|             |                       | Absent days, simple mean                       | 18.21                 | 25.82                  | NC     | 44.0                    |
|             |                       | Absent days, regression-adjusted mean (95% CI) | 16.8 (8.0-25.6)       | 62.5 (33.0-92.1)       | NC     | 79.3 (56.8-101.4)       |
|             |                       | Estimated cost, mean (95% CI)                  | \$2,359 (1,121-3,597) | \$8,789 (4,634-12,944) | NC     | \$11,148 (7,984-14,255) |
| Extremities | Upper extremities     | Injury patients, n                             | 45                    | 247                    | 156    |                         |
|             |                       | With >0 absences, n patients                   | 35                    | 100                    | 6      |                         |
|             |                       | No. absences (patients with >0), mean n days   | 42.05                 | 68.53                  | 102.86 |                         |
|             |                       | No. absences (all patients), mean n days       | 32.71                 | 27.74                  | 3.96   |                         |
|             |                       | Control enrollees, n                           | 197                   | 1,206                  | 747    |                         |
|             |                       | With >0 absences, n enrollees                  | 157                   | 67                     | 15     |                         |
|             |                       | No. absences (enrollees with >0), mean n days  | 33.17                 | 37.67                  | 48.29  |                         |
|             |                       | No. absences (all enrollees), mean n days      | 26.44                 | 2.09                   | 0.97   |                         |
|             |                       | Estimated attributable absences and cost       |                       |                        |        |                         |
|             |                       | Absent days, simple mean                       | NC                    | 25.65                  | NC     | 25.7                    |
|             |                       | Absent days, regression-adjusted mean (95% CI) | NC                    | 44.8 (22.6-66.9)       | NC     | 44.8 (22.6-66.9)        |
|             |                       | Estimated cost, mean (95% CI)                  | NC                    | \$6,296 (3,179-9,412)  | NC     | \$6,296 (3,179-9,412)   |
|             | Lower extremities     | Injury patients, n                             | 83                    | 440                    | 290    |                         |
|             |                       | With >0 absences, n patients                   | 65                    | 208                    | 4      |                         |
|             |                       | No. absences (patients with >0), mean n days   | 61.52                 | 78.33                  | 17.32  |                         |
|             |                       | No. absences (all patients), mean n days       | 48.18                 | 37.03                  | 0.24   |                         |
|             |                       | Control enrollees, n                           | 368                   | 2,134                  | 1,396  |                         |
|             |                       | With >0 absences, n enrollees                  | 284                   | 138                    | 40     |                         |
|             |                       | No. absences (enrollees with >0), mean n days  | 35.64                 | 42.45                  | 50.20  |                         |
|             |                       | No. absences (all enrollees), mean n days      | 27.50                 | 2.75                   | 1.44   |                         |
|             |                       | Estimated attributable absences and cost       |                       |                        |        |                         |
|             |                       | Absent days, simple mean                       | 20.68                 | 34.28                  | NC     | 55.0                    |
|             |                       | Absent days, regression-adjusted mean (95% CI) | 18.7 (8.1-29.2)       | 69.2 (41.6-96.9)       | NC     | 87.9 (67.2-109.4)       |
|             |                       | Estimated cost, mean (95% CI)                  | \$2,626 (1,140-4,111) | \$9,734 (5,848-13,622) | NC     | \$12,361 (9,443-15,378) |
|             | Torso, Total          | Injury patients, n                             | 128                   | 687                    | 446    |                         |
|             |                       | With >0 absences, n patients                   | 100                   | 308                    | 10     |                         |
|             |                       | No. absences (patients with >0), mean n days   | 54.71                 | 75.15                  | 68.64  |                         |

|                                                |                                                |                                                |                     |                       |       |                        |  |
|------------------------------------------------|------------------------------------------------|------------------------------------------------|---------------------|-----------------------|-------|------------------------|--|
|                                                |                                                | No. absences (all patients), mean n days       | 42.74               | 33.69                 | 1.54  |                        |  |
|                                                |                                                | Control enrollees, n                           | 565                 | 3,340                 | 2,143 |                        |  |
|                                                |                                                | With >0 absences, n enrollees                  | 441                 | 205                   | 55    |                        |  |
|                                                |                                                | No. absences (enrollees with >0), mean n days  | 34.76               | 40.89                 | 49.68 |                        |  |
|                                                |                                                | No. absences (all enrollees), mean n days      | 27.13               | 2.51                  | 1.27  |                        |  |
|                                                |                                                | Estimated attributable absences and cost       |                     |                       |       |                        |  |
|                                                |                                                | Absent days, simple mean                       | 15.61               | 31.18                 | NC    | 46.8                   |  |
|                                                |                                                | Absent days, regression-adjusted mean (95% CI) | 12.6 (5.2-20.0)     | 48.5 (34.9-62.1)      | NC    | 61.1 (49.8-72.3)       |  |
|                                                |                                                | Estimated cost, mean (95% CI)                  | \$1,770 (724-2,816) | \$6,819 (4,906-8,733) | NC    | \$8,589 (6,997-10,161) |  |
| Unclassifiable by site                         | Other or multiple                              | Injury patients, n                             | 7                   | 23                    | 16    |                        |  |
|                                                |                                                | With >0 absences, n patients                   | 5                   | 7                     | 0     |                        |  |
|                                                |                                                | No. absences (patients with >0), mean n days   | 70.84               | 53.37                 | 0.00  |                        |  |
|                                                |                                                | No. absences (all patients), mean n days       | 50.60               | 16.24                 | 0.00  |                        |  |
|                                                |                                                | Control enrollees, n                           | 31                  | 112                   | 75    |                        |  |
|                                                |                                                | With >0 absences, n enrollees                  | 25                  | 4                     | 3     |                        |  |
|                                                |                                                | No. absences (enrollees with >0), mean n days  | 37.59               | 33.93                 | 14.05 |                        |  |
|                                                |                                                | No. absences (all enrollees), mean n days      | 30.31               | 1.21                  | 0.56  |                        |  |
|                                                |                                                | Estimated attributable absences and cost       |                     |                       |       |                        |  |
|                                                |                                                | Absent days, simple mean                       | NC                  | NC                    | NC    | NC                     |  |
|                                                | Absent days, regression-adjusted mean (95% CI) | NC                                             | NC                  | NC                    | NC    |                        |  |
|                                                | Estimated cost, mean (95% CI)                  | NC                                             | NC                  | NC                    | NC    |                        |  |
|                                                | System-wide                                    | Injury patients, n                             | 50                  | 304                   | 169   |                        |  |
|                                                |                                                | With >0 absences, n patients                   | 35                  | 105                   | 5     |                        |  |
|                                                |                                                | No. absences (patients with >0), mean n days   | 67.72               | 52.74                 | 18.57 |                        |  |
|                                                |                                                | No. absences (all patients), mean n days       | 47.40               | 18.22                 | 0.55  |                        |  |
|                                                |                                                | Control enrollees, n                           | 196                 | 1,455                 | 794   |                        |  |
|                                                |                                                | With >0 absences, n enrollees                  | 154                 | 128                   | 24    |                        |  |
|                                                |                                                | No. absences (enrollees with >0), mean n days  | 37.87               | 46.52                 | 62.35 |                        |  |
|                                                |                                                | No. absences (all enrollees), mean n days      | 29.76               | 4.09                  | 1.88  |                        |  |
| Estimated attributable absences and cost       |                                                |                                                |                     |                       |       |                        |  |
| Absent days, simple mean                       |                                                | NC                                             | 14.13               | NC                    | 14.1  |                        |  |
| Absent days, regression-adjusted mean (95% CI) | NC                                             | 20.2 (12.8-27.5)                               | NC                  | 20.2 (12.8-27.5)      |       |                        |  |
| Estimated cost, mean (95% CI)                  | NC                                             | \$2,835 (1,800-3,868)                          | NC                  | \$2,835 (1,800-3,868) |       |                        |  |
| Unclassifiable by site, Total                  | Injury patients, n                             | 57                                             | 327                 | 185                   |       |                        |  |
|                                                | With >0 absences, n patients                   | 40                                             | 112                 | 5                     |       |                        |  |
|                                                | No. absences (patients with >0), mean n days   | 68.11                                          | 52.78               | 18.57                 |       |                        |  |
|                                                | No. absences (all patients), mean n days       | 47.79                                          | 18.08               | 0.50                  |       |                        |  |
|                                                | Control enrollees, n                           | 227                                            | 1,567               | 869                   |       |                        |  |
|                                                | With >0 absences, n enrollees                  | 179                                            | 132                 | 27                    |       |                        |  |
|                                                | No. absences (enrollees with >0), mean n days  | 37.83                                          | 46.14               | 56.98                 |       |                        |  |
|                                                | No. absences (all enrollees), mean n days      | 29.83                                          | 3.89                | 1.77                  |       |                        |  |
|                                                | Estimated attributable absences and cost       |                                                |                     |                       |       |                        |  |
|                                                | Absent days, simple mean                       | NC                                             | 14.19               | NC                    | 14.2  |                        |  |
| Absent days, regression-adjusted mean (95% CI) | NC                                             | 22.9 (14.4-31.3)                               | NC                  | 22.9 (14.4-31.3)      |       |                        |  |
| Estimated cost, mean (95% CI)                  | NC                                             | \$3,216 (2,029-4,402)                          | NC                  | \$3,216 (2,029-4,402) |       |                        |  |
| All body regions                               | All body regions                               | Injury patients, n                             | 388                 | 1,983                 | 1,234 |                        |  |
|                                                |                                                | With >0 absences, n patients                   | 300                 | 878                   | 34    |                        |  |
|                                                |                                                | No. absences (patients with >0), mean n days   | 60.76               | 70.17                 | 42.33 |                        |  |
|                                                |                                                | No. absences (all patients), mean n days       | 46.98               | 31.07                 | 1.17  |                        |  |
|                                                |                                                | Control enrollees, n                           | 1,689               | 9,638                 | 5,888 |                        |  |
|                                                |                                                | With >0 absences, n enrollees                  | 1,322               | 614                   | 149   |                        |  |
|                                                |                                                | No. absences (enrollees with >0), mean n days  | 34.96               | 41.45                 | 48.99 |                        |  |
|                                                |                                                | No. absences (all enrollees), mean n days      | 27.36               | 2.64                  | 1.24  |                        |  |
|                                                |                                                | Estimated attributable absences and cost       |                     |                       |       |                        |  |
|                                                |                                                | Absent days, simple mean                       | 19.62               | 28.43                 | NC    | 48.1                   |  |
| Absent days, regression-adjusted mean (95% CI) | 16.3 (11.8-20.9)                               | 43.8 (37.0-50.6)                               | NC                  | 60.1 (54.2-65.9)      |       |                        |  |
| Estimated cost, mean (95% CI)                  | \$2,292 (1,654-2,932)                          | \$6,154 (5,200-7,109)                          | NC                  | \$8,446 (7,615-9,270) |       |                        |  |

Notes. All costs are 2015 USD. NC = not calculated, due to low number of observations (<50 injury or control enrollees with >0 absences) in the data source. NS = not significant, the regression-adjusted attributable number of lost work days due to the injury type was not statistically significantly higher among injured patients compared to control enrollees. Values are mean (95% confidence interval [CI] or prediction interval [PI])—in the case that multiple estimates by absence type were probabilistically combined using @RISK). For injury types with just one attributable absence type value reported, "Total" days reflects that absence type's mean (95% CI) regression-adjusted value. Otherwise, variance for "Total" days estimates was based on a probabilistic combination of variance for multiple absence type estimates (e.g., workplace absence + short-term disability absence estimates for Traumatic brain injuries) using Excel Palisade @RISK (Ithaca, NY). For those calculations, 1,000 sums drawn from Pert distributions representing each absence type—with mean (95% CI) estimates of absent days by type included as the distributions' most likely, minimum, and maximum values—were computed, and the middle 95% of resulting values comprise the reported PI range. Total cost was assessed as the mean number of days and 95% CI or PI values multiplied by the estimated value of lost work days described in the Methods text (\$141). Source data: MarketScan Health and Productivity Management dataset, 2014-2016. Injury classification is based on the ICD-9-CM Barrell Matrix ([www.cdc.gov/nchs/injury/injury\\_tools.htm](http://www.cdc.gov/nchs/injury/injury_tools.htm)).

**STable 6. Number of injury and control enrollees and estimated average per-person one-year number and associated value of lost work days due to non-fatal injuries (by body region) initially treated in an emergency department during October 1, 2014 through September 30, 2015, Marketscan – Employer health insurance enrollees age 18-64 years, ED disposition: Treated and released (2015 USD)**

| Body Region                                    | Body Region                                    | Measure                                       | Work absence        | Short-term disability | Workers' compensation | Total days and cost |
|------------------------------------------------|------------------------------------------------|-----------------------------------------------|---------------------|-----------------------|-----------------------|---------------------|
| Head and neck                                  | Traumatic brain injury                         | Injury patients, n                            | 256                 | 1,562                 | 948                   |                     |
|                                                |                                                | With >0 absences, n patients                  | 195                 | 248                   | 36                    |                     |
|                                                |                                                | No. absences (patients with >0), mean n days  | 39.41               | 52.74                 | 53.89                 |                     |
|                                                |                                                | No. absences (all patients), mean n days      | 30.02               | 8.37                  | 2.05                  |                     |
|                                                |                                                | Control enrollees, n                          | 1,144               | 7,576                 | 4,479                 |                     |
|                                                |                                                | With >0 absences, n enrollees                 | 825                 | 485                   | 85                    |                     |
|                                                |                                                | No. absences (enrollees with >0), mean n days | 32.68               | 40.42                 | 51.59                 |                     |
|                                                |                                                | No. absences (all enrollees), mean n days     | 23.57               | 2.59                  | 0.98                  |                     |
|                                                |                                                | Estimated attributable absences and cost      |                     |                       |                       |                     |
|                                                | Absent days, simple mean                       | 6.45                                          | 5.78                | NC                    | 12.2                  |                     |
|                                                | Absent days, regression-adjusted mean (95% CI) | 6.3 (2.0-10.6)                                | 8.1 (5.7-10.5)      | NC                    | 14.4 (10.8-18.0)      |                     |
|                                                | Estimated cost, mean (95% CI)                  | \$884 (280-1,489)                             | \$1,140 (799-1,481) | NC                    | \$2,024 (1,515-2,526) |                     |
|                                                | Other head, face, and neck                     | Injury patients, n                            | 1,560               | 9,552                 | 5,834                 |                     |
|                                                |                                                | With >0 absences, n patients                  | 1,167               | 1,044                 | 223                   |                     |
|                                                |                                                | No. absences (patients with >0), mean n days  | 34.04               | 44.22                 | 48.32                 |                     |
|                                                |                                                | No. absences (all patients), mean n days      | 25.47               | 4.83                  | 1.85                  |                     |
|                                                |                                                | Control enrollees, n                          | 6,981               | 46,459                | 27,906                |                     |
|                                                |                                                | With >0 absences, n enrollees                 | 5,240               | 2,657                 | 618                   |                     |
|                                                |                                                | No. absences (enrollees with >0), mean n days | 32.39               | 40.78                 | 43.87                 |                     |
| No. absences (all enrollees), mean n days      |                                                | 24.31                                         | 2.33                | 0.97                  |                       |                     |
| Estimated attributable absences and cost       |                                                |                                               |                     |                       |                       |                     |
| Absent days, simple mean                       | 1.16                                           | 2.50                                          | 0.88                | 4.5                   |                       |                     |
| Absent days, regression-adjusted mean (95% CI) | NS                                             | 2.7 (2.2-3.2)                                 | 0.8 (0.4-1.3)       | 3.5 (3.0-4.0)         |                       |                     |
| Estimated cost, mean (95% CI)                  | NS                                             | \$378 (302-454)                               | \$118 (56-180)      | \$496 (423-567)       |                       |                     |
| Head and neck, Total                           | Injury patients, n                             | 1,816                                         | 11,114              | 6,782                 |                       |                     |
|                                                | With >0 absences, n patients                   | 1,362                                         | 1,292               | 259                   |                       |                     |
|                                                | No. absences (patients with >0), mean n days   | 34.81                                         | 45.86               | 49.10                 |                       |                     |
|                                                | No. absences (all patients), mean n days       | 26.11                                         | 5.33                | 1.88                  |                       |                     |
|                                                | Control enrollees, n                           | 8,125                                         | 54,035              | 32,385                |                       |                     |
|                                                | With >0 absences, n enrollees                  | 6,065                                         | 3,142               | 703                   |                       |                     |
|                                                | No. absences (enrollees with >0), mean n days  | 32.43                                         | 40.72               | 44.81                 |                       |                     |
|                                                | No. absences (all enrollees), mean n days      | 24.21                                         | 2.37                | 0.97                  |                       |                     |
|                                                | Estimated attributable absences and cost       |                                               |                     |                       |                       |                     |
| Absent days, simple mean                       | 1.90                                           | 2.96                                          | 0.91                | 5.8                   |                       |                     |
| Absent days, regression-adjusted mean (95% CI) | 1.5 (0.3-2.7)                                  | 3.3 (2.8-3.9)                                 | 0.8 (0.4-1.2)       | 5.6 (4.7-6.6)         |                       |                     |
| Estimated cost, mean (95% CI)                  | \$214 (42-385)                                 | \$467 (389-544)                               | \$112 (56-169)      | \$793 (655-930)       |                       |                     |
| Spine and back                                 | Spinal cord (SCI)                              | Injury patients, n                            | 0                   | 9                     | 5                     |                     |
|                                                |                                                | With >0 absences, n patients                  | 0                   | 3                     | 0                     |                     |
|                                                |                                                | No. absences (patients with >0), mean n days  | 0.00                | 21.90                 | 0.00                  |                     |
|                                                |                                                | No. absences (all patients), mean n days      | 0.00                | 7.30                  | 0.00                  |                     |
|                                                |                                                | Control enrollees, n                          | 0                   | 42                    | 21                    |                     |
|                                                |                                                | With >0 absences, n enrollees                 | 0                   | 6                     | 1                     |                     |
|                                                |                                                | No. absences (enrollees with >0), mean n days | 0.00                | 56.90                 | 25.71                 |                     |
|                                                |                                                | No. absences (all enrollees), mean n days     | 0.00                | 8.13                  | 1.22                  |                     |
|                                                |                                                | Estimated attributable absences and cost      |                     |                       |                       |                     |
|                                                | Absent days, simple mean                       | NC                                            | NC                  | NC                    | NC                    |                     |
|                                                | Absent days, regression-adjusted mean (95% CI) | NC                                            | NC                  | NC                    | NC                    |                     |
|                                                | Estimated cost, mean (95% CI)                  | NC                                            | NC                  | NC                    | NC                    |                     |
|                                                | Vertebral column (VCI)                         | Injury patients, n                            | 1,179               | 7,144                 | 4,625                 |                     |
|                                                |                                                | With >0 absences, n patients                  | 891                 | 1,272                 | 220                   |                     |
|                                                |                                                | No. absences (patients with >0), mean n days  | 37.76               | 46.84                 | 56.72                 |                     |



|             |                       |                                                |                 |                     |                 |                       |
|-------------|-----------------------|------------------------------------------------|-----------------|---------------------|-----------------|-----------------------|
|             |                       | No. absences (all patients), mean n days       | 28.54           | 8.34                | 2.70            |                       |
|             |                       | Control enrollees, n                           | 5,294           | 34,716              | 22,057          |                       |
|             |                       | With >0 absences, n enrollees                  | 3,862           | 2,309               | 437             |                       |
|             |                       | No. absences (enrollees with >0), mean n days  | 32.09           | 40.01               | 48.02           |                       |
|             |                       | No. absences (all enrollees), mean n days      | 23.41           | 2.66                | 0.95            |                       |
|             |                       | Estimated attributable absences and cost       |                 |                     |                 |                       |
|             |                       | Absent days, simple mean                       | 5.13            | 5.68                | 1.75            | 12.6                  |
|             |                       | Absent days, regression-adjusted mean (95% CI) | 4.1 (2.4-5.8)   | 6.8 (6.0-7.7)       | 2.3 (1.5-3.2)   | 13.2 (11.7-14.7)      |
|             |                       | Estimated cost, mean (95% CI)                  | \$574 (330-817) | \$962 (839-1,083)   | \$328 (210-447) | \$1,863 (1,651-2,070) |
|             | Spine and back, Total | Injury patients, n                             | 1,179           | 7,153               | 4,630           |                       |
|             |                       | With >0 absences, n patients                   | 891             | 1,275               | 220             |                       |
|             |                       | No. absences (patients with >0), mean n days   | 37.76           | 46.78               | 56.72           |                       |
|             |                       | No. absences (all patients), mean n days       | 28.54           | 8.34                | 2.70            |                       |
|             |                       | Control enrollees, n                           | 5,294           | 34,758              | 22,078          |                       |
|             |                       | With >0 absences, n enrollees                  | 3,862           | 2,315               | 438             |                       |
|             |                       | No. absences (enrollees with >0), mean n days  | 32.09           | 40.05               | 47.96           |                       |
|             |                       | No. absences (all enrollees), mean n days      | 23.41           | 2.67                | 0.95            |                       |
|             |                       | Estimated attributable absences and cost       |                 |                     |                 |                       |
|             |                       | Absent days, simple mean                       | 5.13            | 5.67                | 1.75            | 12.6                  |
|             |                       | Absent days, regression-adjusted mean (95% CI) | 4.1 (2.4-5.8)   | 6.8 (6.0-7.7)       | 2.3 (1.5-3.2)   | 13.2 (11.7-14.8)      |
|             |                       | Estimated cost, mean (95% CI)                  | \$574 (330-817) | \$960 (839-1,083)   | \$328 (210-447) | \$1,862 (1,650-2,081) |
| Torso       | Torso                 | Injury patients, n                             | 839             | 5,085               | 3,349           |                       |
|             |                       | With >0 absences, n patients                   | 634             | 815                 | 134             |                       |
|             |                       | No. absences (patients with >0), mean n days   | 38.95           | 48.02               | 59.74           |                       |
|             |                       | No. absences (all patients), mean n days       | 29.44           | 7.70                | 2.39            |                       |
|             |                       | Control enrollees, n                           | 3,706           | 24,742              | 15,958          |                       |
|             |                       | With >0 absences, n enrollees                  | 2,785           | 1,535               | 394             |                       |
|             |                       | No. absences (enrollees with >0), mean n days  | 33.45           | 42.42               | 47.58           |                       |
|             |                       | No. absences (all enrollees), mean n days      | 25.14           | 2.63                | 1.17            |                       |
|             |                       | Estimated attributable absences and cost       |                 |                     |                 |                       |
|             |                       | Absent days, simple mean                       | 4.30            | 5.07                | 1.22            | 10.6                  |
|             |                       | Absent days, regression-adjusted mean (95% CI) | 2.4 (0.5-4.3)   | 5.4 (4.5-6.3)       | 1.1 (0.5-1.7)   | 8.9 (7.3-10.4)        |
|             |                       | Estimated cost, mean (95% CI)                  | \$339 (70-607)  | \$759 (633-887)     | \$153 (63-243)  | \$1,252 (1,032-1,457) |
| Extremities | Upper extremities     | Injury patients, n                             | 3,595           | 20,926              | 13,376          |                       |
|             |                       | With >0 absences, n patients                   | 2,700           | 3,161               | 502             |                       |
|             |                       | No. absences (patients with >0), mean n days   | 37.57           | 48.11               | 57.22           |                       |
|             |                       | No. absences (all patients), mean n days       | 28.22           | 7.27                | 2.15            |                       |
|             |                       | Control enrollees, n                           | 16,186          | 102,007             | 64,201          |                       |
|             |                       | With >0 absences, n enrollees                  | 12,097          | 5,773               | 1,434           |                       |
|             |                       | No. absences (enrollees with >0), mean n days  | 32.61           | 41.62               | 46.85           |                       |
|             |                       | No. absences (all enrollees), mean n days      | 24.38           | 2.36                | 1.05            |                       |
|             |                       | Estimated attributable absences and cost       |                 |                     |                 |                       |
|             |                       | Absent days, simple mean                       | 3.84            | 4.91                | 1.10            | 9.9                   |
|             |                       | Absent days, regression-adjusted mean (95% CI) | 3.1 (2.2-4.0)   | 5.9 (5.4-6.3)       | 1.0 (0.7-1.4)   | 10.0 (9.2-10.7)       |
|             |                       | Estimated cost, mean (95% CI)                  | \$430 (302-560) | \$827 (762-891)     | \$146 (101-190) | \$1,403 (1,293-1,511) |
|             | Lower extremities     | Injury patients, n                             | 2,634           | 16,750              | 10,620          |                       |
|             |                       | With >0 absences, n patients                   | 1,969           | 3,068               | 402             |                       |
|             |                       | No. absences (patients with >0), mean n days   | 39.91           | 50.25               | 54.33           |                       |
|             |                       | No. absences (all patients), mean n days       | 29.84           | 9.20                | 2.06            |                       |
|             |                       | Control enrollees, n                           | 11,685          | 81,528              | 50,751          |                       |
|             |                       | With >0 absences, n enrollees                  | 8,668           | 5,203               | 1,143           |                       |
|             |                       | No. absences (enrollees with >0), mean n days  | 32.53           | 41.23               | 45.51           |                       |
|             |                       | No. absences (all enrollees), mean n days      | 24.13           | 2.63                | 1.02            |                       |
|             |                       | Estimated attributable absences and cost       |                 |                     |                 |                       |
|             |                       | Absent days, simple mean                       | 5.71            | 6.57                | 1.04            | 13.3                  |
|             |                       | Absent days, regression-adjusted mean (95% CI) | 4.2 (3.1-5.4)   | 7.6 (7.0-8.2)       | 1.0 (0.7-1.4)   | 12.8 (11.9-13.8)      |
|             |                       | Estimated cost, mean (95% CI)                  | \$593 (433-752) | \$1,067 (988-1,146) | \$146 (96-197)  | \$1,807 (1,677-1,936) |
|             | Torso, Total          | Injury patients, n                             | 6,229           | 37,676              | 23,996          |                       |
|             |                       | With >0 absences, n patients                   | 4,669           | 6,229               | 904             |                       |

|                        |                                               |                                                |                                                |                 |                   |                       |                       |
|------------------------|-----------------------------------------------|------------------------------------------------|------------------------------------------------|-----------------|-------------------|-----------------------|-----------------------|
|                        |                                               | No. absences (patients with >0), mean n days   | 38.56                                          | 49.17           | 55.94             |                       |                       |
|                        |                                               | No. absences (all patients), mean n days       | 28.90                                          | 8.13            | 2.11              |                       |                       |
|                        |                                               | Control enrollees, n                           | 27,871                                         | 183,535         | 114,952           |                       |                       |
|                        |                                               | With >0 absences, n enrollees                  | 20,765                                         | 10,976          | 2,577             |                       |                       |
|                        |                                               | No. absences (enrollees with >0), mean n days  | 32.58                                          | 41.43           | 46.26             |                       |                       |
|                        |                                               | No. absences (all enrollees), mean n days      | 24.27                                          | 2.48            | 1.04              |                       |                       |
|                        |                                               | Estimated attributable absences and cost       |                                                |                 |                   |                       |                       |
|                        |                                               | Absent days, simple mean                       | 4.63                                           | 5.65            | 1.07              | 11.4                  |                       |
|                        |                                               | Absent days, regression-adjusted mean (95% CI) | 3.6 (2.8-4.3)                                  | 6.6 (6.3-7.0)   | 1.0 (0.8-1.3)     | 11.2 (10.6-11.8)      |                       |
|                        |                                               | Estimated cost, mean (95% CI)                  | \$499 (399-600)                                | \$934 (883-984) | \$145 (111-177)   | \$1,578 (1,496-1,661) |                       |
| Unclassifiable by site | Other or multiple                             | Injury patients, n                             | 297                                            | 1,696           | 1,130             |                       |                       |
|                        |                                               | With >0 absences, n patients                   | 226                                            | 277             | 51                |                       |                       |
|                        |                                               | No. absences (patients with >0), mean n days   | 38.98                                          | 48.21           | 59.27             |                       |                       |
|                        |                                               | No. absences (all patients), mean n days       | 29.66                                          | 7.87            | 2.68              |                       |                       |
|                        |                                               | Control enrollees, n                           | 1,319                                          | 8,263           | 5,394             |                       |                       |
|                        |                                               | With >0 absences, n enrollees                  | 965                                            | 543             | 144               |                       |                       |
|                        | No. absences (enrollees with >0), mean n days | 32.98                                          | 45.85                                          | 48.40           |                   |                       |                       |
|                        | No. absences (all enrollees), mean n days     | 24.13                                          | 3.01                                           | 1.29            |                   |                       |                       |
|                        |                                               |                                                | Estimated attributable absences and cost       |                 |                   |                       |                       |
|                        |                                               |                                                | Absent days, simple mean                       | 5.53            | 4.86              | 1.39                  | 11.8                  |
|                        |                                               |                                                | Absent days, regression-adjusted mean (95% CI) | 3.9 (0.8-7.0)   | 5.9 (4.1-7.7)     | 1.6 (0.2-3.0)         | 11.4 (8.7-14.3)       |
|                        |                                               |                                                | Estimated cost, mean (95% CI)                  | \$548 (108-988) | \$831 (578-1,083) | \$228 (30-426)        | \$1,607 (1,220-2,004) |
|                        |                                               | System-wide                                    | Injury patients, n                             | 534             | 3,114             | 1,988                 |                       |
|                        |                                               |                                                | With >0 absences, n patients                   | 411             | 326               | 102                   |                       |
|                        |                                               |                                                | No. absences (patients with >0), mean n days   | 37.36           | 45.80             | 46.11                 |                       |
|                        |                                               |                                                | No. absences (all patients), mean n days       | 28.75           | 4.79              | 2.37                  |                       |
|                        |                                               |                                                | Control enrollees, n                           | 2,405           | 15,196            | 9,546                 |                       |
|                        |                                               |                                                | With >0 absences, n enrollees                  | 1,812           | 893               | 228                   |                       |
|                        | No. absences (enrollees with >0), mean n days | 33.93                                          | 40.62                                          | 52.66           |                   |                       |                       |
|                        | No. absences (all enrollees), mean n days     | 25.56                                          | 2.39                                           | 1.26            |                   |                       |                       |
|                        |                                               | Estimated attributable absences and cost       |                                                |                 |                   |                       |                       |
|                        |                                               | Absent days, simple mean                       | 3.19                                           | 2.40            | 1.11              | 6.7                   |                       |
|                        |                                               | Absent days, regression-adjusted mean (95% CI) | 3.1 (0.8-5.3)                                  | 2.1 (1.3-2.9)   | 1.6 (0.4-2.7)     | 6.7 (4.8-8.6)         |                       |
|                        |                                               | Estimated cost, mean (95% CI)                  | \$433 (117-749)                                | \$294 (181-408) | \$221 (60-382)    | \$948 (670-1,216)     |                       |
|                        | Unclassifiable by site, Total                 | Injury patients, n                             | 831                                            | 4,810           | 3,118             |                       |                       |
|                        |                                               | With >0 absences, n patients                   | 637                                            | 603             | 153               |                       |                       |
|                        |                                               | No. absences (patients with >0), mean n days   | 37.93                                          | 46.91           | 50.49             |                       |                       |
|                        |                                               | No. absences (all patients), mean n days       | 29.08                                          | 5.88            | 2.48              |                       |                       |
|                        |                                               | Control enrollees, n                           | 3,724                                          | 23,459          | 14,940            |                       |                       |
|                        |                                               | With >0 absences, n enrollees                  | 2,777                                          | 1,436           | 372               |                       |                       |
|                        | No. absences (enrollees with >0), mean n days | 33.60                                          | 42.60                                          | 51.01           |                   |                       |                       |
|                        | No. absences (all enrollees), mean n days     | 25.05                                          | 2.61                                           | 1.27            |                   |                       |                       |
|                        |                                               | Estimated attributable absences and cost       |                                                |                 |                   |                       |                       |
|                        |                                               | Absent days, simple mean                       | 4.03                                           | 3.27            | 1.21              | 8.5                   |                       |
|                        |                                               | Absent days, regression-adjusted mean (95% CI) | 3.4 (1.6-5.3)                                  | 3.4 (2.6-4.2)   | 1.7 (0.7-2.7)     | 8.5 (6.9-10.0)        |                       |
|                        |                                               | Estimated cost, mean (95% CI)                  | \$484 (225-741)                                | \$479 (366-593) | \$236 (101-373)   | \$1,199 (977-1,407)   |                       |
| All body regions       | All body regions                              | Injury patients, n                             | 10,894                                         | 65,838          | 41,875            |                       |                       |
|                        |                                               | With >0 absences, n patients                   | 8,193                                          | 10,214          | 1,670             |                       |                       |
|                        |                                               | No. absences (patients with >0), mean n days   | 37.83                                          | 48.22           | 54.79             |                       |                       |
|                        |                                               | No. absences (all patients), mean n days       | 28.45                                          | 7.48            | 2.18              |                       |                       |
|                        |                                               | Control enrollees, n                           | 48,720                                         | 320,529         | 200,313           |                       |                       |
|                        |                                               | With >0 absences, n enrollees                  | 36,254                                         | 19,404          | 4,484             |                       |                       |
|                        |                                               | No. absences (enrollees with >0), mean n days  | 32.65                                          | 41.32           | 46.71             |                       |                       |
|                        |                                               | No. absences (all enrollees), mean n days      | 24.29                                          | 2.50            | 1.05              |                       |                       |
|                        |                                               | Estimated attributable absences and cost       |                                                |                 |                   |                       |                       |
|                        |                                               | Absent days, simple mean                       | 4.16                                           | 4.98            | 1.13              | 10.3                  |                       |
|                        |                                               | Absent days, regression-adjusted mean (95% CI) | 3.2 (2.6-3.7)                                  | 5.7 (5.4-5.9)   | 1.1 (0.9-1.3)     | 10.0 (9.5-10.4)       |                       |
|                        |                                               | Estimated cost, mean (95% CI)                  | \$446 (370-520)                                | \$799 (763-835) | \$156 (131-183)   | \$1,401 (1,337-1,465) |                       |

Notes. All costs are 2015 USD. NC = not calculated, due to low number of observations (<50 injury or control enrollees with >0 absences) in the data source. NS = not significant, the regression-adjusted attributable number of lost work days due to the injury type was not statistically significantly higher among injured patients compared to control enrollees. Values are mean (95% confidence interval [CI] or prediction interval [PI])—in the case that multiple estimates by absence type were probabilistically combined using @RISK). For injury types with just one attributable absence type value reported, "Total" days reflects that absence type's mean (95% CI) regression-adjusted value. Otherwise, variance for "Total" days estimates was based on a probabilistic combination of variance for multiple absence type estimates (e.g., workplace absence + short-term disability absence estimates for Traumatic brain injuries) using Excel Palisade @RISK (Ithaca, NY). For those calculations, 1,000 sums drawn from Pert distributions representing each absence type—with mean (95% CI) estimates of absent days by type included as the distributions' most likely, minimum, and maximum values—were computed, and the middle 95% of resulting values comprise the reported PI range. Total cost was assessed as the mean number of days and 95% CI or PI values multiplied by the estimated value of lost work days described in the Methods text (\$141).  
Source data: MarketScan Health and Productivity Management dataset, 2014-2016. Injury classification is based on the ICD-9-CM Barrell Matrix ([www.cdc.gov/nchs/injury/injury\\_tools.htm](http://www.cdc.gov/nchs/injury/injury_tools.htm)).

**STable 7. Characteristics of injury patients and control enrollees after matching**

| Measure                         | Absence         |                     |                  | Short-term disability |                     |                  | Workers' compensation |                     |                  |
|---------------------------------|-----------------|---------------------|------------------|-----------------------|---------------------|------------------|-----------------------|---------------------|------------------|
|                                 | Injury<br>n (%) | Non-injury<br>n (%) | p-value<br>n (%) | Injury<br>n (%)       | Non-injury<br>n (%) | p-value<br>n (%) | Injury<br>n (%)       | Non-injury<br>n (%) | p-value<br>n (%) |
| Total                           | 11,282          | 50,409              |                  | 67,821                | 330,167             |                  | 43,109                | 206,201             |                  |
| Age (Mean±SE)                   | 45.0 (0.11)     | 45.2 (0.05)         | 0.0884           | 44.5 (0.04)           | 44.6 (0.02)         | 0.0015           | 44.9 (0.05)           | 45.1 (0.02)         | <.0001           |
| Sex                             |                 |                     | <.0001           |                       |                     | 0.249            |                       |                     | 0.0169           |
| Male                            | 7,947 (70.4)    | 36,520 (72.4)       |                  | 39,332 (58.0)         | 192,268 (58.2)      |                  | 26,472 (61.4)         | 127,889 (62.0)      |                  |
| Female                          | 3,335 (29.6)    | 13,889 (27.6)       |                  | 28,489 (42.0)         | 137,899 (41.8)      |                  | 16,637 (38.6)         | 78,312 (38.0)       |                  |
| Region                          |                 |                     | 0.0003           |                       |                     | <.0001           |                       |                     | <.0001           |
| Northeast                       | 1,550 (13.7)    | 6,337 (12.6)        |                  | 10,590 (15.6)         | 51,279 (15.5)       |                  | 5,979 (13.9)          | 28,081 (13.6)       |                  |
| North central                   | 2,811 (24.9)    | 12,158 (24.1)       |                  | 18,042 (26.6)         | 86,813 (26.3)       |                  | 14,279 (33.1)         | 67,776 (32.9)       |                  |
| South                           | 4,322 (38.3)    | 20,066 (39.8)       |                  | 27,604 (40.7)         | 135,867 (41.2)      |                  | 17,388 (40.3)         | 84,784 (41.1)       |                  |
| West                            | 2,597 (23.0)    | 11,846 (23.5)       |                  | 11,500 (17.0)         | 55,982 (17.0)       |                  | 5,440 (12.6)          | 25,517 (12.4)       |                  |
| Unknown/missing                 | 2 (0.0)         | 2 (0.0)             |                  | 85 (0.1)              | 226 (0.1)           |                  | 23 (0.1)              | 43 (0.0)            |                  |
| Health Insurance Plan Type      |                 |                     | <.0001           |                       |                     | <.0001           |                       |                     | <.0001           |
| Comprehensive                   | 3 (0.0)         | 3 (0.0)             |                  | 2,663 (3.9)           | 10,927 (3.3)        |                  | 2,363 (5.5)           | 9,663 (4.7)         |                  |
| Exclusive Provider Organization | 152 (1.3)       | 439 (0.9)           |                  | 308 (0.5)             | 884 (0.3)           |                  | 211 (0.5)             | 564 (0.3)           |                  |
| Health Maintenance Organization | 1,610 (14.3)    | 6,600 (13.1)        |                  | 5,738 (8.5)           | 27,460 (8.3)        |                  | 4,276 (9.9)           | 19,938 (9.7)        |                  |
| Non-Capitated Point-of-Service  | 364 (3.2)       | 1,201 (2.4)         |                  | 2,489 (3.7)           | 10,394 (3.1)        |                  | 2,873 (6.7)           | 12,378 (6.0)        |                  |
| Preferred Provider Organization | 5,058 (44.8)    | 23,722 (47.1)       |                  | 38,111 (56.2)         | 189,817 (57.5)      |                  | 22,200 (51.5)         | 110,198 (53.4)      |                  |
| Consumer-Driven Health Plan     | 3,759 (33.3)    | 17,394 (34.5)       |                  | 11,819 (17.4)         | 58,264 (17.6)       |                  | 7,836 (18.2)          | 38,034 (18.4)       |                  |
| High Deductible Health Plan     | 336 (3.0)       | 1,050 (2.1)         |                  | 6,693 (9.9)           | 32,421 (9.8)        |                  | 3,350 (7.8)           | 15,426 (7.5)        |                  |
